# Supplementary material for: An expanding manifold in transmodal regions characterizes adolescent reconfiguration of structural connectome organization
Source: eLife. 2021 Mar 31;10:e64694. doi: 10.7554/eLife.64694 (PMC8087442; doi:10.7554/eLife.64694)
Supplement: Figure 1—source data 1. [file elife-64694-fig1-data1.xlsx]

## Sheet: Figure 1
1A									1B					1C				1D
	Component number	Scaled eigenvalue		Region	Manifold values					Region	Manifold eccentricity				Region	T-statistic			Cortical hierarchy	T-statistic
					E1	E2	E3				Baseline	Follow-up
	1	0.206856		LH_Vis_1	0.0305296	0.0893969	-0.0252548			LH_Vis_1	0.0869258	0.0880431			LH_Vis_1	2.38542			Idiotypic	0.460705
	2	0.157831		LH_Vis_2	0.0228787	0.0992103	-0.0337139			LH_Vis_2	0.0937743	0.101414			LH_Vis_2	2.57442			Unimodal	0.304649
	3	0.135115		LH_Vis_3	0.0469327	0.0983042	-0.035801			LH_Vis_3	0.101396	0.105889			LH_Vis_3	0.430225			Heteromodal	1.191
	4	0.110853		LH_Vis_4	0.00975031	0.0812904	-0.0285693			LH_Vis_4	0.0788638	0.0808069			LH_Vis_4	2.14132			Paralimbic	1.10899
	5	0.0990432		LH_Vis_5	0.0114766	0.075917	-0.0196968			LH_Vis_5	0.0590587	0.0696085			LH_Vis_5	1.53166
	6	0.0818937		LH_Vis_6	0.00775798	0.0410568	-0.0230817			LH_Vis_6	0.0530395	0.0522065			LH_Vis_6	1.48046			Functional community	T-statistic
	7	0.0762285		LH_Vis_7	0.000777573	0.0751435	-0.0279978			LH_Vis_7	0.0747009	0.0780955			LH_Vis_7	1.74002
	8	0.0718729		LH_Vis_8	0.0405388	0.0929272	-0.0378823			LH_Vis_8	0.0904867	0.0939583			LH_Vis_8	-0.347456			Visual	0.928756
	9	0.0603081		LH_Vis_9	0.00868138	0.0946348	-0.0361149			LH_Vis_9	0.0890785	0.0942085			LH_Vis_9	1.78795			Somatomotor	0.464832
				LH_Vis_10	-0.0124707	0.0713071	-0.0566679			LH_Vis_10	0.0999753	0.101115			LH_Vis_10	0.865766			Dorsal attention	0.430283
				LH_Vis_11	0.0191028	0.087675	-0.0391497			LH_Vis_11	0.0889667	0.0933071			LH_Vis_11	2.82707			Ventral attention	0.544683
				LH_Vis_12	-0.0347235	0.0484204	-0.0691586			LH_Vis_12	0.100892	0.0994106			LH_Vis_12	-0.0154556			Limbic	1.0262
				LH_Vis_13	-0.0211472	0.0625275	-0.0511471			LH_Vis_13	0.0948045	0.0950525			LH_Vis_13	0.87628			Frontoparietal	0.820101
				LH_Vis_14	-0.0123391	0.0686375	-0.070426			LH_Vis_14	0.0970303	0.0969252			LH_Vis_14	0.378524			Default mode	0.951619
				LH_SomMot_1	0.0612224	0.0485789	-0.00454612			LH_SomMot_1	0.0909542	0.0901935			LH_SomMot_1	-0.668008
				LH_SomMot_2	0.0662163	0.0127883	-0.0152748			LH_SomMot_2	0.101435	0.103295			LH_SomMot_2	0.313296
				LH_SomMot_3	0.0633792	-0.0412324	0.0303684			LH_SomMot_3	0.0977429	0.101452			LH_SomMot_3	0.185508
				LH_SomMot_4	0.0539316	-0.0533187	0.039107			LH_SomMot_4	0.100896	0.103232			LH_SomMot_4	0.926478
				LH_SomMot_5	0.0739988	-0.0448771	0.011581			LH_SomMot_5	0.105626	0.107173			LH_SomMot_5	0.761007
				LH_SomMot_6	0.0694116	-0.0788779	0.0119032			LH_SomMot_6	0.114416	0.114648			LH_SomMot_6	-0.408648
				LH_SomMot_7	0.0522938	-0.0808483	-0.00961885			LH_SomMot_7	0.0985994	0.0966871			LH_SomMot_7	-0.202413
				LH_SomMot_8	-0.0515951	-0.0619796	-0.0301967			LH_SomMot_8	0.0865692	0.0859583			LH_SomMot_8	1.05002
				LH_SomMot_9	0.0411075	-0.0788185	-0.0467273			LH_SomMot_9	0.105834	0.105159			LH_SomMot_9	-0.12332
				LH_SomMot_10	0.0398853	-0.0803396	-0.0425751			LH_SomMot_10	0.10975	0.108586			LH_SomMot_10	0.323638
				LH_SomMot_11	-0.00890829	-0.0673388	-0.079634			LH_SomMot_11	0.1008	0.104054			LH_SomMot_11	0.881358
				LH_SomMot_12	0.00457647	-0.0750492	-0.047691			LH_SomMot_12	0.094399	0.0917824			LH_SomMot_12	0.560053
				LH_SomMot_13	-0.0100592	-0.0724425	-0.0793098			LH_SomMot_13	0.11177	0.112583			LH_SomMot_13	-0.133623
				LH_SomMot_14	-0.00186139	-0.0636029	-0.0127347			LH_SomMot_14	0.0708575	0.0699897			LH_SomMot_14	0.319415
				LH_SomMot_15	-0.0363248	-0.0460432	-0.0888938			LH_SomMot_15	0.11827	0.117877			LH_SomMot_15	0.86227
				LH_SomMot_16	-0.0218533	-0.0651972	-0.0853751			LH_SomMot_16	0.104367	0.104441			LH_SomMot_16	1.34334
				LH_DorsAttn_Post_1	0.0605475	0.0920431	-0.0232203			LH_DorsAttn_Post_1	0.109045	0.111822			LH_DorsAttn_Post_1	0.901355
				LH_DorsAttn_Post_2	0.0574965	0.0771746	-0.0253555			LH_DorsAttn_Post_2	0.0913561	0.0949529			LH_DorsAttn_Post_2	-1.44939
				LH_DorsAttn_Post_3	-0.0151455	0.0335923	-0.0778364			LH_DorsAttn_Post_3	0.0990237	0.0998936			LH_DorsAttn_Post_3	0.759315
				LH_DorsAttn_Post_4	0.0694967	-0.073646	-0.0279902			LH_DorsAttn_Post_4	0.115684	0.114498			LH_DorsAttn_Post_4	0.554351
				LH_DorsAttn_Post_5	0.04597	-0.0824734	-0.0556494			LH_DorsAttn_Post_5	0.11505	0.115646			LH_DorsAttn_Post_5	0.10997
				LH_DorsAttn_Post_6	0.00678022	-0.0538184	-0.0763267			LH_DorsAttn_Post_6	0.0874251	0.089714			LH_DorsAttn_Post_6	1.11622
				LH_DorsAttn_Post_7	-0.0427333	0.00636526	-0.0699558			LH_DorsAttn_Post_7	0.0974242	0.0993663			LH_DorsAttn_Post_7	1.31984
				LH_DorsAttn_Post_8	-0.0190308	-0.0170292	-0.0675241			LH_DorsAttn_Post_8	0.0808934	0.0832097			LH_DorsAttn_Post_8	-0.270133
				LH_DorsAttn_Post_9	-0.0541256	-0.00606623	-0.0773217			LH_DorsAttn_Post_9	0.110768	0.114208			LH_DorsAttn_Post_9	1.69766
				LH_DorsAttn_Post_10	-0.044721	-0.0373077	-0.0898778			LH_DorsAttn_Post_10	0.115659	0.118278			LH_DorsAttn_Post_10	0.806999
				LH_DorsAttn_FEF_1	0.0253168	-0.0699674	0.0124193			LH_DorsAttn_FEF_1	0.0766578	0.0756173			LH_DorsAttn_FEF_1	-0.578473
				LH_DorsAttn_FEF_2	0.00410037	-0.0642892	0.0416566			LH_DorsAttn_FEF_2	0.0746689	0.0756099			LH_DorsAttn_FEF_2	-1.11549
				LH_DorsAttn_PrCv_1	0.0335792	-0.0600889	0.0690979			LH_DorsAttn_PrCv_1	0.0915678	0.0946787			LH_DorsAttn_PrCv_1	0.755019
				LH_SalVentAttn_ParOper_1	0.0544632	-0.032576	-0.0446872			LH_SalVentAttn_ParOper_1	0.102315	0.102444			LH_SalVentAttn_ParOper_1	1.46539
				LH_SalVentAttn_ParOper_2	0.0772908	-0.0577328	-0.00194343			LH_SalVentAttn_ParOper_2	0.108347	0.109567			LH_SalVentAttn_ParOper_2	0.893084
				LH_SalVentAttn_ParOper_3	0.0437709	-0.0538931	-0.0414196			LH_SalVentAttn_ParOper_3	0.0906797	0.0926381			LH_SalVentAttn_ParOper_3	2.42799
				LH_SalVentAttn_FrOperIns_1	0.0439017	0.0688565	0.00431505			LH_SalVentAttn_FrOperIns_1	0.0860403	0.0832082			LH_SalVentAttn_FrOperIns_1	-0.0550889
				LH_SalVentAttn_FrOperIns_2	-0.0515091	-0.0059465	0.123194			LH_SalVentAttn_FrOperIns_2	0.131109	0.13214			LH_SalVentAttn_FrOperIns_2	1.42997
				LH_SalVentAttn_FrOperIns_3	0.0171947	-0.0346799	0.0705634			LH_SalVentAttn_FrOperIns_3	0.0903055	0.0928894			LH_SalVentAttn_FrOperIns_3	0.582189
				LH_SalVentAttn_FrOperIns_4	-0.00110938	-0.0353604	0.0870883			LH_SalVentAttn_FrOperIns_4	0.0932883	0.0956922			LH_SalVentAttn_FrOperIns_4	1.07215
				LH_SalVentAttn_PFCl_1	-0.060911	-0.0242238	0.129052			LH_SalVentAttn_PFCl_1	0.136199	0.139412			LH_SalVentAttn_PFCl_1	3.01232
				LH_SalVentAttn_Med_1	-0.0637322	-0.0461555	0.0825971			LH_SalVentAttn_Med_1	0.0961469	0.0972144			LH_SalVentAttn_Med_1	1.54213
				LH_SalVentAttn_Med_2	-0.0531357	-0.0428983	-0.0788068			LH_SalVentAttn_Med_2	0.121535	0.121811			LH_SalVentAttn_Med_2	1.76104
				LH_SalVentAttn_Med_3	-0.0138421	-0.0569854	0.0131878			LH_SalVentAttn_Med_3	0.0731104	0.072183			LH_SalVentAttn_Med_3	-1.03123
				LH_Limbic_OFC_1	-0.036917	0.0108518	0.0686563			LH_Limbic_OFC_1	0.0738732	0.0770747			LH_Limbic_OFC_1	0.945054
				LH_Limbic_OFC_2	-0.0432229	0.0092371	0.0730753			LH_Limbic_OFC_2	0.0914477	0.0933822			LH_Limbic_OFC_2	2.18233
				LH_Limbic_TempPole_1	0.0159777	0.0514079	-0.0192234			LH_Limbic_TempPole_1	0.0651482	0.0639326			LH_Limbic_TempPole_1	1.30391
				LH_Limbic_TempPole_2	0.0383194	0.0750424	-0.0204219			LH_Limbic_TempPole_2	0.0948939	0.0946995			LH_Limbic_TempPole_2	0.355764
				LH_Limbic_TempPole_3	0.013116	0.0467891	-0.0191683			LH_Limbic_TempPole_3	0.0555846	0.0525633			LH_Limbic_TempPole_3	0.558418
				LH_Limbic_TempPole_4	0.0286861	0.0603253	-0.020614			LH_Limbic_TempPole_4	0.0745255	0.070578			LH_Limbic_TempPole_4	-0.759034
				LH_Cont_Par_1	0.0435901	-0.0145633	-0.0226828			LH_Cont_Par_1	0.0706416	0.0702674			LH_Cont_Par_1	0.474937
				LH_Cont_Par_2	0.00343615	0.00486181	-0.0570867			LH_Cont_Par_2	0.0659688	0.0678263			LH_Cont_Par_2	-1.80692
				LH_Cont_Par_3	0.0394924	-0.055728	-0.0581667			LH_Cont_Par_3	0.0930412	0.0940017			LH_Cont_Par_3	1.57679
				LH_Cont_Temp_1	0.0629813	0.0738762	-0.0211962			LH_Cont_Temp_1	0.0955968	0.09714			LH_Cont_Temp_1	-0.611745
				LH_Cont_OFC_1	-0.0511967	0.00838505	0.0944346			LH_Cont_OFC_1	0.116525	0.118852			LH_Cont_OFC_1	1.22978
				LH_Cont_PFCl_1	-0.0458561	0.00219836	0.0943932			LH_Cont_PFCl_1	0.107	0.110799			LH_Cont_PFCl_1	1.28592
				LH_Cont_PFCl_2	-0.0722285	-0.00685787	0.132222			LH_Cont_PFCl_2	0.146109	0.148272			LH_Cont_PFCl_2	3.53271
				LH_Cont_PFCl_3	-0.054533	-0.0102099	0.121993			LH_Cont_PFCl_3	0.126397	0.130344			LH_Cont_PFCl_3	3.30427
				LH_Cont_PFCl_4	-0.0295095	-0.035055	0.115077			LH_Cont_PFCl_4	0.113406	0.115066			LH_Cont_PFCl_4	0.288024
				LH_Cont_PFCl_5	0.0143337	-0.0628084	0.0695026			LH_Cont_PFCl_5	0.0830121	0.0849409			LH_Cont_PFCl_5	-0.0381289
				LH_Cont_pCun_1	-0.0430201	0.0325187	-0.0738619			LH_Cont_pCun_1	0.105816	0.104617			LH_Cont_pCun_1	0.847596
				LH_Cont_Cing_1	-0.0282247	-0.0604374	-0.04809			LH_Cont_Cing_1	0.0835219	0.0805268			LH_Cont_Cing_1	-0.606292
				LH_Cont_Cing_2	-0.0595423	-0.0398132	0.00197308			LH_Cont_Cing_2	0.0616664	0.06103			LH_Cont_Cing_2	-0.862407
				LH_Default_Temp_1	0.0160622	0.0527498	-0.0145352			LH_Default_Temp_1	0.0740509	0.0725805			LH_Default_Temp_1	0.469992
				LH_Default_Temp_2	0.038147	0.0713615	-0.0193224			LH_Default_Temp_2	0.0878158	0.0882114			LH_Default_Temp_2	0.349878
				LH_Default_Temp_3	0.0356272	0.0611154	-0.0168248			LH_Default_Temp_3	0.0882563	0.0849106			LH_Default_Temp_3	0.206223
				LH_Default_Temp_4	0.0620822	0.0677277	-0.0153239			LH_Default_Temp_4	0.0972083	0.0942528			LH_Default_Temp_4	-1.84381
				LH_Default_Temp_5	0.0713905	0.0492462	-0.0221557			LH_Default_Temp_5	0.0972602	0.0980387			LH_Default_Temp_5	-1.15765
				LH_Default_Par_1	0.0471016	0.057631	-0.0445719			LH_Default_Par_1	0.086572	0.0889645			LH_Default_Par_1	-0.635574
				LH_Default_Par_2	0.0170563	0.0522696	-0.0441315			LH_Default_Par_2	0.0677259	0.0695808			LH_Default_Par_2	0.593107
				LH_Default_Par_3	0.0435703	-0.0163722	-0.0372084			LH_Default_Par_3	0.0760883	0.0779824			LH_Default_Par_3	0.939294
				LH_Default_Par_4	0.0302582	0.0298075	-0.0449603			LH_Default_Par_4	0.0695448	0.0712314			LH_Default_Par_4	-0.398491
				LH_Default_PFC_1	-0.0342795	0.0182911	0.071498			LH_Default_PFC_1	0.0883116	0.0901691			LH_Default_PFC_1	0.602222
				LH_Default_PFC_2	-0.0517299	0.00456108	0.0853773			LH_Default_PFC_2	0.104294	0.104273			LH_Default_PFC_2	2.27479
				LH_Default_PFC_3	-0.0533524	-0.000407745	0.105898			LH_Default_PFC_3	0.118633	0.119235			LH_Default_PFC_3	1.89632
				LH_Default_PFC_4	-0.055681	0.00439712	0.0946059			LH_Default_PFC_4	0.114597	0.115992			LH_Default_PFC_4	2.52264
				LH_Default_PFC_5	-0.0463068	-0.0218165	0.120318			LH_Default_PFC_5	0.121347	0.123389			LH_Default_PFC_5	2.07181
				LH_Default_PFC_6	-0.0714993	-0.0089261	0.128435			LH_Default_PFC_6	0.135716	0.135121			LH_Default_PFC_6	3.60479
				LH_Default_PFC_7	-0.0583622	-0.00565915	0.0994979			LH_Default_PFC_7	0.122183	0.124115			LH_Default_PFC_7	3.79431
				LH_Default_PFC_8	-0.0667177	-0.0248081	0.128821			LH_Default_PFC_8	0.13004	0.129271			LH_Default_PFC_8	1.47551
				LH_Default_PFC_9	-0.0558341	-0.0201743	0.0931513			LH_Default_PFC_9	0.100503	0.104271			LH_Default_PFC_9	4.85613
				LH_Default_PFC_10	-0.0643256	-0.0206311	0.105775			LH_Default_PFC_10	0.117394	0.119419			LH_Default_PFC_10	5.36126
				LH_Default_PFC_11	-0.00621592	-0.0393419	0.0695279			LH_Default_PFC_11	0.0726936	0.073879			LH_Default_PFC_11	-0.708246
				LH_Default_PFC_12	-0.0353519	-0.0400644	0.0882183			LH_Default_PFC_12	0.0963441	0.0989383			LH_Default_PFC_12	2.31542
				LH_Default_PFC_13	-0.045542	-0.0419491	0.104915			LH_Default_PFC_13	0.0894857	0.0932039			LH_Default_PFC_13	3.48555
				LH_Default_pCunPCC_1	-0.0179587	0.0208833	-0.0779222			LH_Default_pCunPCC_1	0.0886796	0.0864789			LH_Default_pCunPCC_1	-0.700768
				LH_Default_pCunPCC_2	-0.0303554	-0.0272082	-0.0817526			LH_Default_pCunPCC_2	0.100777	0.0986923			LH_Default_pCunPCC_2	-0.0870808
				LH_Default_pCunPCC_3	-0.0619835	-0.0462862	-0.0535842			LH_Default_pCunPCC_3	0.0866045	0.0882356			LH_Default_pCunPCC_3	0.283972
				LH_Default_pCunPCC_4	-0.0620448	-0.000405937	-0.0935183			LH_Default_pCunPCC_4	0.114263	0.115591			LH_Default_pCunPCC_4	0.809679
				LH_Default_PHC_1	0.0362631	0.0814407	-0.0188624			LH_Default_PHC_1	0.0781824	0.0788161			LH_Default_PHC_1	2.58912
				RH_Vis_1	0.0186554	0.0792211	0.000812994			RH_Vis_1	0.0922168	0.0912609			RH_Vis_1	0.285871
				RH_Vis_2	0.00969375	0.0569568	-0.00455899			RH_Vis_2	0.0718681	0.0709867			RH_Vis_2	1.71209
				RH_Vis_3	0.00660303	0.0578444	-0.0101623			RH_Vis_3	0.0740911	0.0780071			RH_Vis_3	0.781408
				RH_Vis_4	0.000440772	0.0393027	-0.00620365			RH_Vis_4	0.0642932	0.0681168			RH_Vis_4	1.25754
				RH_Vis_5	0.0158365	0.0615992	-0.0135229			RH_Vis_5	0.0730202	0.0729766			RH_Vis_5	0.276829
				RH_Vis_6	-0.00872607	0.0506719	-0.0134369			RH_Vis_6	0.0514725	0.0561759			RH_Vis_6	0.911125
				RH_Vis_7	-0.00649617	0.0377033	-0.0310133			RH_Vis_7	0.0584169	0.0583431			RH_Vis_7	-0.228386
				RH_Vis_8	-0.000537729	0.0623661	-0.0171221			RH_Vis_8	0.0533198	0.0594376			RH_Vis_8	0.56332
				RH_Vis_9	-0.0142205	0.049498	-0.0220446			RH_Vis_9	0.0713329	0.0749466			RH_Vis_9	-0.0239984
				RH_Vis_10	-0.00931999	0.0551313	-0.0406484			RH_Vis_10	0.0777709	0.0794175			RH_Vis_10	-2.02362
				RH_Vis_11	-0.00692473	0.0604203	-0.0347888			RH_Vis_11	0.0739416	0.0765751			RH_Vis_11	0.955811
				RH_Vis_12	-0.0254423	0.0590751	-0.0392152			RH_Vis_12	0.0796253	0.0821138			RH_Vis_12	0.31436
				RH_Vis_13	-0.0385657	0.0518239	-0.0469822			RH_Vis_13	0.0871556	0.0873213			RH_Vis_13	-2.09504
				RH_Vis_14	-0.0273123	0.0514779	-0.0396705			RH_Vis_14	0.0724044	0.0740906			RH_Vis_14	0.962016
				RH_Vis_15	-0.0210659	0.0523771	-0.0671323			RH_Vis_15	0.0926879	0.0920445			RH_Vis_15	2.32514
				RH_SomMot_1	0.0964798	0.018162	0.0108284			RH_SomMot_1	0.107205	0.109325			RH_SomMot_1	2.51153
				RH_SomMot_2	0.0903112	0.0329991	0.00897854			RH_SomMot_2	0.0999666	0.102393			RH_SomMot_2	2.81522
				RH_SomMot_3	0.078236	-0.0550166	0.0418961			RH_SomMot_3	0.110293	0.110188			RH_SomMot_3	1.08334
				RH_SomMot_4	0.104845	-0.022216	-0.00169714			RH_SomMot_4	0.118328	0.116403			RH_SomMot_4	2.14176
				RH_SomMot_5	0.0600211	-0.051988	0.0414467			RH_SomMot_5	0.0973985	0.0979366			RH_SomMot_5	0.849313
				RH_SomMot_6	0.086956	-0.0449972	0.0131916			RH_SomMot_6	0.116245	0.116587			RH_SomMot_6	1.69909
				RH_SomMot_7	0.068352	-0.066645	-0.00448429			RH_SomMot_7	0.112878	0.111254			RH_SomMot_7	0.117014
				RH_SomMot_8	-0.0748925	-0.0552489	0.0114127			RH_SomMot_8	0.085759	0.0846493			RH_SomMot_8	0.829513
				RH_SomMot_9	0.0463165	-0.0625418	-0.0743628			RH_SomMot_9	0.111481	0.114388			RH_SomMot_9	0.505126
				RH_SomMot_10	0.0275815	-0.073437	-0.0508007			RH_SomMot_10	0.0933615	0.0937324			RH_SomMot_10	0.893228
				RH_SomMot_11	-0.0773225	-0.065442	0.00747654			RH_SomMot_11	0.100798	0.0996204			RH_SomMot_11	1.20708
				RH_SomMot_12	0.00387086	-0.0599888	-0.078105			RH_SomMot_12	0.104137	0.107407			RH_SomMot_12	0.170718
				RH_SomMot_13	-0.0102252	-0.0440948	-0.092785			RH_SomMot_13	0.102988	0.109988			RH_SomMot_13	-0.106406
				RH_SomMot_14	-0.0349534	-0.0621689	-0.0621262			RH_SomMot_14	0.0984673	0.100015			RH_SomMot_14	0.441912
				RH_SomMot_15	-0.0138937	-0.0551511	-0.0919018			RH_SomMot_15	0.116736	0.121042			RH_SomMot_15	-0.692732
				RH_SomMot_16	-0.0172505	-0.0741021	5.98326e-05			RH_SomMot_16	0.0793646	0.077542			RH_SomMot_16	0.295365
				RH_SomMot_17	-0.0663399	-0.022029	-0.0634844			RH_SomMot_17	0.11167	0.112936			RH_SomMot_17	-1.80599
				RH_SomMot_18	-0.0599765	-0.0243193	-0.0518036			RH_SomMot_18	0.101938	0.0988224			RH_SomMot_18	-0.382764
				RH_SomMot_19	-0.0536239	-0.0380019	-0.0695542			RH_SomMot_19	0.106588	0.106808			RH_SomMot_19	-0.797524
				RH_DorsAttn_Post_1	0.0360453	0.0761891	-0.0233489			RH_DorsAttn_Post_1	0.0986862	0.0973424			RH_DorsAttn_Post_1	-0.34168
				RH_DorsAttn_Post_2	0.0286343	0.0639753	-0.0360863			RH_DorsAttn_Post_2	0.0878231	0.0878601			RH_DorsAttn_Post_2	-0.293829
				RH_DorsAttn_Post_3	0.0786164	-0.0592853	-0.0429161			RH_DorsAttn_Post_3	0.109139	0.11001			RH_DorsAttn_Post_3	0.36719
				RH_DorsAttn_Post_4	0.0308135	-0.0240912	-0.0982831			RH_DorsAttn_Post_4	0.106789	0.112675			RH_DorsAttn_Post_4	1.58557
				RH_DorsAttn_Post_5	0.0387696	-0.0611995	-0.0888509			RH_DorsAttn_Post_5	0.120422	0.123737			RH_DorsAttn_Post_5	0.317406
				RH_DorsAttn_Post_6	-0.0357419	0.0346925	-0.0490814			RH_DorsAttn_Post_6	0.0835717	0.0855731			RH_DorsAttn_Post_6	1.18287
				RH_DorsAttn_Post_7	0.0104741	-0.0186998	-0.0936501			RH_DorsAttn_Post_7	0.0972121	0.102999			RH_DorsAttn_Post_7	3.38451
				RH_DorsAttn_Post_8	-0.0305561	0.0283718	-0.0676188			RH_DorsAttn_Post_8	0.0959493	0.0993716			RH_DorsAttn_Post_8	1.48431
				RH_DorsAttn_Post_9	-0.0569026	0.0137071	-0.0629238			RH_DorsAttn_Post_9	0.102577	0.10554			RH_DorsAttn_Post_9	-0.398608
				RH_DorsAttn_Post_10	-0.0411136	-0.00985099	-0.0699925			RH_DorsAttn_Post_10	0.101814	0.107572			RH_DorsAttn_Post_10	-0.752666
				RH_DorsAttn_FEF_1	0.0170958	-0.0736889	0.0302284			RH_DorsAttn_FEF_1	0.0899608	0.0877136			RH_DorsAttn_FEF_1	0.716389
				RH_DorsAttn_FEF_2	-0.00128749	-0.0720051	0.0834716			RH_DorsAttn_FEF_2	0.105847	0.10607			RH_DorsAttn_FEF_2	-0.285312
				RH_DorsAttn_PrCv_1	0.0176783	-0.0631184	0.0803725			RH_DorsAttn_PrCv_1	0.106516	0.106837			RH_DorsAttn_PrCv_1	-0.386035
				RH_SalVentAttn_TempOccPar_1	0.0764066	0.049946	-0.0185609			RH_SalVentAttn_TempOccPar_1	0.0949846	0.0944518			RH_SalVentAttn_TempOccPar_1	-0.94666
				RH_SalVentAttn_TempOccPar_2	0.0922075	0.0140473	-0.018555			RH_SalVentAttn_TempOccPar_2	0.098357	0.0988459			RH_SalVentAttn_TempOccPar_2	0.53614
				RH_SalVentAttn_TempOccPar_3	0.0891861	-0.0359942	-0.0376045			RH_SalVentAttn_TempOccPar_3	0.119752	0.119784			RH_SalVentAttn_TempOccPar_3	0.497645
				RH_SalVentAttn_PrC_1	0.0289986	-0.0646273	0.0569279			RH_SalVentAttn_PrC_1	0.0904317	0.0890347			RH_SalVentAttn_PrC_1	0.562761
				RH_SalVentAttn_FrOperIns_1	0.0127012	0.0712918	0.00141703			RH_SalVentAttn_FrOperIns_1	0.0747241	0.0705613			RH_SalVentAttn_FrOperIns_1	-0.587015
				RH_SalVentAttn_FrOperIns_2	0.0588462	0.0524426	0.0158494			RH_SalVentAttn_FrOperIns_2	0.0892962	0.0907969			RH_SalVentAttn_FrOperIns_2	0.740715
				RH_SalVentAttn_FrOperIns_3	-0.0335257	-0.0202631	0.0949105			RH_SalVentAttn_FrOperIns_3	0.0870838	0.0859758			RH_SalVentAttn_FrOperIns_3	0.94324
				RH_SalVentAttn_FrOperIns_4	0.0118495	-0.0439756	0.0838242			RH_SalVentAttn_FrOperIns_4	0.0976685	0.0977897			RH_SalVentAttn_FrOperIns_4	0.953706
				RH_SalVentAttn_Med_1	-0.0579878	-0.0640489	0.0936327			RH_SalVentAttn_Med_1	0.11222	0.111395			RH_SalVentAttn_Med_1	-2.12728
				RH_SalVentAttn_Med_2	-0.0792536	-0.0350952	-0.0542295			RH_SalVentAttn_Med_2	0.113759	0.11376			RH_SalVentAttn_Med_2	0.0125066
				RH_SalVentAttn_Med_3	-0.0344377	-0.0760524	0.0942612			RH_SalVentAttn_Med_3	0.102499	0.10275			RH_SalVentAttn_Med_3	-2.06516
				RH_Limbic_OFC_1	-0.0263046	0.0257269	0.020209			RH_Limbic_OFC_1	0.0507725	0.054178			RH_Limbic_OFC_1	3.27826
				RH_Limbic_OFC_2	-0.0205182	0.0261899	0.0174622			RH_Limbic_OFC_2	0.0453734	0.0476178			RH_Limbic_OFC_2	1.07155
				RH_Limbic_OFC_3	-0.0268585	0.0231915	0.0237795			RH_Limbic_OFC_3	0.059054	0.0605499			RH_Limbic_OFC_3	3.09432
				RH_Limbic_TempPole_1	-0.00773126	0.048269	-0.00478435			RH_Limbic_TempPole_1	0.062613	0.0603471			RH_Limbic_TempPole_1	-0.0623172
				RH_Limbic_TempPole_2	0.00676771	0.066933	0.000925578			RH_Limbic_TempPole_2	0.0884054	0.0879177			RH_Limbic_TempPole_2	-1.28874
				RH_Limbic_TempPole_3	-0.00639604	0.0528393	-0.00472292			RH_Limbic_TempPole_3	0.0629478	0.0599283			RH_Limbic_TempPole_3	0.913044
				RH_Cont_Par_1	0.0542965	-0.00864745	-0.0581373			RH_Cont_Par_1	0.0896792	0.090387			RH_Cont_Par_1	0.307552
				RH_Cont_Par_2	0.0495179	-0.0128599	-0.0775609			RH_Cont_Par_2	0.096056	0.0978772			RH_Cont_Par_2	1.55924
				RH_Cont_Par_3	0.012716	0.024988	-0.0729065			RH_Cont_Par_3	0.0842196	0.0873503			RH_Cont_Par_3	3.34895
				RH_Cont_Temp_1	0.0652909	0.0687414	-0.0055866			RH_Cont_Temp_1	0.0948548	0.0945848			RH_Cont_Temp_1	-0.309107
				RH_Cont_PFCv_1	-0.0223387	0.0137008	0.0362202			RH_Cont_PFCv_1	0.0472929	0.0490419			RH_Cont_PFCv_1	1.5992
				RH_Cont_PFCl_1	-0.0295502	0.0168864	0.0424671			RH_Cont_PFCl_1	0.0602621	0.0631476			RH_Cont_PFCl_1	2.86934
				RH_Cont_PFCl_2	-0.0399222	-0.00364687	0.0816295			RH_Cont_PFCl_2	0.0871825	0.0885547			RH_Cont_PFCl_2	4.79756
				RH_Cont_PFCl_3	-0.0259286	-0.00697751	0.0756487			RH_Cont_PFCl_3	0.0764091	0.0776157			RH_Cont_PFCl_3	1.42762
				RH_Cont_PFCl_4	-0.0152632	-0.0545678	0.111349			RH_Cont_PFCl_4	0.111318	0.111688			RH_Cont_PFCl_4	-0.602461
				RH_Cont_PFCl_5	-0.0379602	-0.026632	0.101504			RH_Cont_PFCl_5	0.106424	0.109654			RH_Cont_PFCl_5	-1.01183
				RH_Cont_PFCl_6	-0.00715233	-0.0316778	0.0745731			RH_Cont_PFCl_6	0.0781085	0.080984			RH_Cont_PFCl_6	0.541936
				RH_Cont_PFCl_7	-0.00333557	-0.0674746	0.087035			RH_Cont_PFCl_7	0.101226	0.102409			RH_Cont_PFCl_7	1.13866
				RH_Cont_pCun_1	-0.0431529	0.0454041	-0.0564326			RH_Cont_pCun_1	0.0939201	0.0960794			RH_Cont_pCun_1	0.591355
				RH_Cont_Cing_1	-0.0737866	-0.0623552	0.000748291			RH_Cont_Cing_1	0.0845746	0.0803505			RH_Cont_Cing_1	-0.639301
				RH_Cont_Cing_2	-0.0606407	-0.062811	0.0496319			RH_Cont_Cing_2	0.0802218	0.079289			RH_Cont_Cing_2	-1.27061
				RH_Cont_PFCmp_1	-0.0421053	-0.0411565	0.111223			RH_Cont_PFCmp_1	0.109547	0.11135			RH_Cont_PFCmp_1	0.448057
				RH_Cont_PFCmp_2	-0.0417885	-0.0464286	0.109497			RH_Cont_PFCmp_2	0.11699	0.118869			RH_Cont_PFCmp_2	0.234161
				RH_Default_Par_1	0.0207522	0.0519481	-0.0472155			RH_Default_Par_1	0.0775562	0.0783685			RH_Default_Par_1	0.830383
				RH_Default_Par_2	0.0474094	0.0368999	-0.0544549			RH_Default_Par_2	0.0972315	0.0988253			RH_Default_Par_2	0.2969
				RH_Default_Par_3	0.030665	0.0346524	-0.0540221			RH_Default_Par_3	0.0716638	0.0754689			RH_Default_Par_3	1.28634
				RH_Default_Temp_1	0.00250464	0.0652668	-0.000243596			RH_Default_Temp_1	0.0755456	0.0746541			RH_Default_Temp_1	0.318917
				RH_Default_Temp_2	0.0273016	0.0771385	0.00210104			RH_Default_Temp_2	0.0908022	0.0903899			RH_Default_Temp_2	-1.15451
				RH_Default_Temp_3	0.0521171	0.073236	0.00700158			RH_Default_Temp_3	0.0943537	0.0934797			RH_Default_Temp_3	0.376062
				RH_Default_Temp_4	0.0670549	0.0651661	0.00449742			RH_Default_Temp_4	0.0908248	0.0927409			RH_Default_Temp_4	0.591477
				RH_Default_Temp_5	0.0865166	0.0517392	0.00239042			RH_Default_Temp_5	0.104519	0.10387			RH_Default_Temp_5	0.356692
				RH_Default_PFCv_1	-0.0290391	-0.023589	0.0945741			RH_Default_PFCv_1	0.0827526	0.0847979			RH_Default_PFCv_1	1.73345
				RH_Default_PFCdPFCm_1	-0.0275726	0.0238706	0.0242615			RH_Default_PFCdPFCm_1	0.061766	0.0645719			RH_Default_PFCdPFCm_1	3.75186
				RH_Default_PFCdPFCm_2	-0.0407265	-0.00529221	0.0808451			RH_Default_PFCdPFCm_2	0.08586	0.0879644			RH_Default_PFCdPFCm_2	4.68983
				RH_Default_PFCdPFCm_3	-0.0279508	-0.0511418	0.108831			RH_Default_PFCdPFCm_3	0.0863022	0.083378			RH_Default_PFCdPFCm_3	2.40645
				RH_Default_PFCdPFCm_4	-0.0340702	0.00109691	0.0624057			RH_Default_PFCdPFCm_4	0.0888005	0.0906412			RH_Default_PFCdPFCm_4	2.71855
				RH_Default_PFCdPFCm_5	-0.0370946	-0.0212125	0.0836726			RH_Default_PFCdPFCm_5	0.102077	0.104696			RH_Default_PFCdPFCm_5	0.334858
				RH_Default_PFCdPFCm_6	-0.0175045	-0.0388289	0.0927489			RH_Default_PFCdPFCm_6	0.107326	0.10855			RH_Default_PFCdPFCm_6	-1.04469
				RH_Default_PFCdPFCm_7	-0.0179179	-0.0472453	0.0885503			RH_Default_PFCdPFCm_7	0.102571	0.10492			RH_Default_PFCdPFCm_7	-0.514799
				RH_Default_pCunPCC_1	-0.0398032	0.0345103	-0.064665			RH_Default_pCunPCC_1	0.0783404	0.0782687			RH_Default_pCunPCC_1	-2.22119
				RH_Default_pCunPCC_2	-0.0611278	-0.012487	-0.0357515			RH_Default_pCunPCC_2	0.0869121	0.0855383			RH_Default_pCunPCC_2	-2.69511
				RH_Default_pCunPCC_3	-0.0569087	0.0277602	-0.0566081			RH_Default_pCunPCC_3	0.0938241	0.0948007			RH_Default_pCunPCC_3	0.61229
