# Supplementary material for: An expanding manifold in transmodal regions characterizes adolescent reconfiguration of structural connectome organization
Source: eLife. 2021 Mar 31;10:e64694. doi: 10.7554/eLife.64694 (PMC8087442; doi:10.7554/eLife.64694)
Supplement: Figure 2—source data 1. [file elife-64694-fig2-data1.xlsx]

## Sheet: Figure 2
2A															2B
	Region	Cortical thickness	T-statistic		Cortical hierarchy	T-statistic		Region	MT skewness	T-statistic		Cortical hierarchy	T-statistic			Region	T-statistic		Cortical hierarchy	T-statistic
	LH_Vis_1	2.49439	3.83248		Idiotypic	2.90814		LH_Vis_1	0.566962	2.68409		Idiotypic	4.1551			LH_Vis_1	-0.758758		Idiotypic	-0.59273
	LH_Vis_2	2.52986	3.95214		Unimodal	3.70134		LH_Vis_2	0.36118	2.64531		Unimodal	4.11593			LH_Vis_2	-0.0846481		Unimodal	0.157799
	LH_Vis_3	2.67492	2.61451		Heteromodal	4.13138		LH_Vis_3	0.577889	3.43109		Heteromodal	4.1922			LH_Vis_3	1.27817		Heteromodal	0.563249
	LH_Vis_4	2.50913	1.25678		Paralimbic	2.54867		LH_Vis_4	0.24594	3.76483		Paralimbic	2.37577			LH_Vis_4	-0.338731		Paralimbic	0.198953
	LH_Vis_5	2.3604	1.50741					LH_Vis_5	0.19587	0.722533						LH_Vis_5	-1.44014
	LH_Vis_6	2.26565	2.79247		Functional community	T-statistic		LH_Vis_6	0.389682	3.98495		Functional community	T-statistic			LH_Vis_6	0.699082		Functional community	T-statistic
	LH_Vis_7	2.14798	2.76738					LH_Vis_7	-0.0393018	1.67521						LH_Vis_7	-1.07325
	LH_Vis_8	2.61715	3.04847		Visual	3.1413		LH_Vis_8	0.412625	3.91438		Visual	3.05823			LH_Vis_8	0.941162		Visual	-0.378491
	LH_Vis_9	2.29401	3.12906		Somatomotor	2.96481		LH_Vis_9	0.233766	3.36328		Somatomotor	4.15606			LH_Vis_9	-0.0971698		Somatomotor	-0.207335
	LH_Vis_10	2.19946	4.29042		Dorsal attention	3.60908		LH_Vis_10	0.0785565	2.3798		Dorsal attention	5.0499			LH_Vis_10	-0.658126		Dorsal attention	0.0381372
	LH_Vis_11	2.61231	3.95486		Ventral attention	3.43117		LH_Vis_11	0.425464	2.97983		Ventral attention	4.05154			LH_Vis_11	0.197904		Ventral attention	0.608463
	LH_Vis_12	2.27973	4.28869		Limbic	2.72454		LH_Vis_12	0.136384	2.50086		Limbic	1.83214			LH_Vis_12	-1.44254		Limbic	-0.467135
	LH_Vis_13	2.38495	4.71031		Frontoparietal	3.78924		LH_Vis_13	0.131045	3.73421		Frontoparietal	4.15189			LH_Vis_13	-0.81833		Frontoparietal	0.689513
	LH_Vis_14	2.35667	3.79575		Default mode	4.16424		LH_Vis_14	0.244335	3.77843		Default mode	4.00419			LH_Vis_14	0.02453		Default mode	0.606935
	LH_SomMot_1	2.83781	1.92495					LH_SomMot_1	0.184836	2.89916						LH_SomMot_1	-0.496031
	LH_SomMot_2	2.75322	2.28876					LH_SomMot_2	0.200188	5.01005						LH_SomMot_2	-0.398631
	LH_SomMot_3	2.6845	4.79609					LH_SomMot_3	0.353698	3.32685						LH_SomMot_3	1.09792
	LH_SomMot_4	2.99933	4.00344					LH_SomMot_4	0.387371	1.52134						LH_SomMot_4	1.1733
	LH_SomMot_5	2.9265	3.12335					LH_SomMot_5	0.473343	2.71529						LH_SomMot_5	-0.567516
	LH_SomMot_6	2.45017	1.36342					LH_SomMot_6	0.0437523	4.56521						LH_SomMot_6	-0.958852
	LH_SomMot_7	2.83708	2.73063					LH_SomMot_7	-0.0873499	6.02005						LH_SomMot_7	-1.3844
	LH_SomMot_8	2.72078	3.34318					LH_SomMot_8	0.497991	5.36843						LH_SomMot_8	0.734355
	LH_SomMot_9	2.61599	2.96925					LH_SomMot_9	-0.0242712	3.8725						LH_SomMot_9	-0.728291
	LH_SomMot_10	1.96032	2.72813					LH_SomMot_10	-0.0592682	3.72934						LH_SomMot_10	0.657917
	LH_SomMot_11	2.39915	3.33838					LH_SomMot_11	0.0556515	3.81022						LH_SomMot_11	0.0500036
	LH_SomMot_12	2.89012	2.66312					LH_SomMot_12	-0.315975	5.00944						LH_SomMot_12	-2.97573
	LH_SomMot_13	2.25439	4.37017					LH_SomMot_13	-0.118048	5.02656						LH_SomMot_13	-0.965834
	LH_SomMot_14	2.83002	4.0611					LH_SomMot_14	0.0879602	6.15976						LH_SomMot_14	-1.58806
	LH_SomMot_15	2.65585	4.70142					LH_SomMot_15	-0.180288	4.53729						LH_SomMot_15	-1.26913
	LH_SomMot_16	1.71036	2.40806					LH_SomMot_16	-0.111337	2.37645						LH_SomMot_16	0.0625569
	LH_DorsAttn_Post_1	2.91964	3.86904					LH_DorsAttn_Post_1	0.690668	2.5777						LH_DorsAttn_Post_1	-0.110007
	LH_DorsAttn_Post_2	3.04714	2.13287					LH_DorsAttn_Post_2	0.680706	4.09408						LH_DorsAttn_Post_2	1.36165
	LH_DorsAttn_Post_3	2.40306	5.43233					LH_DorsAttn_Post_3	0.337392	5.88494						LH_DorsAttn_Post_3	-0.275923
	LH_DorsAttn_Post_4	2.60837	1.87987					LH_DorsAttn_Post_4	0.323861	5.98611						LH_DorsAttn_Post_4	-2.10836
	LH_DorsAttn_Post_5	2.38081	2.22593					LH_DorsAttn_Post_5	0.304671	5.09185						LH_DorsAttn_Post_5	0.565643
	LH_DorsAttn_Post_6	2.40461	3.14941					LH_DorsAttn_Post_6	0.246273	5.37716						LH_DorsAttn_Post_6	0.774878
	LH_DorsAttn_Post_7	2.53983	4.02146					LH_DorsAttn_Post_7	0.0974643	4.04672						LH_DorsAttn_Post_7	0.575924
	LH_DorsAttn_Post_8	2.48547	3.90537					LH_DorsAttn_Post_8	0.0419665	5.24584						LH_DorsAttn_Post_8	-0.936636
	LH_DorsAttn_Post_9	2.6446	4.67977					LH_DorsAttn_Post_9	0.196442	5.05325						LH_DorsAttn_Post_9	-0.409712
	LH_DorsAttn_Post_10	2.43897	3.37318					LH_DorsAttn_Post_10	0.0123949	3.90781						LH_DorsAttn_Post_10	-0.785112
	LH_DorsAttn_FEF_1	2.70914	4.1577					LH_DorsAttn_FEF_1	0.394593	7.13182						LH_DorsAttn_FEF_1	-1.38145
	LH_DorsAttn_FEF_2	2.86317	4.39016					LH_DorsAttn_FEF_2	0.258767	7.52506						LH_DorsAttn_FEF_2	-0.853867
	LH_DorsAttn_PrCv_1	2.78374	2.65895					LH_DorsAttn_PrCv_1	0.571478	5.56891						LH_DorsAttn_PrCv_1	2.28195
	LH_SalVentAttn_ParOper_1	2.75151	2.85827					LH_SalVentAttn_ParOper_1	0.428901	4.777						LH_SalVentAttn_ParOper_1	-2.56734
	LH_SalVentAttn_ParOper_2	2.98861	3.31847					LH_SalVentAttn_ParOper_2	0.409712	2.68215						LH_SalVentAttn_ParOper_2	0.268145
	LH_SalVentAttn_ParOper_3	3.04679	2.54207					LH_SalVentAttn_ParOper_3	0.327207	3.62962						LH_SalVentAttn_ParOper_3	-0.446359
	LH_SalVentAttn_FrOperIns_1	3.69764	1.36983					LH_SalVentAttn_FrOperIns_1	0.343709	4.17319						LH_SalVentAttn_FrOperIns_1	-0.399786
	LH_SalVentAttn_FrOperIns_2	2.88061	4.45708					LH_SalVentAttn_FrOperIns_2	0.612158	3.62069						LH_SalVentAttn_FrOperIns_2	1.45902
	LH_SalVentAttn_FrOperIns_3	2.79343	5.26381					LH_SalVentAttn_FrOperIns_3	0.661645	3.47858						LH_SalVentAttn_FrOperIns_3	3.1917
	LH_SalVentAttn_FrOperIns_4	2.90202	3.13536					LH_SalVentAttn_FrOperIns_4	0.459633	3.88347						LH_SalVentAttn_FrOperIns_4	2.26013
	LH_SalVentAttn_PFCl_1	2.6271	5.05927					LH_SalVentAttn_PFCl_1	0.471439	4.50099						LH_SalVentAttn_PFCl_1	1.75773
	LH_SalVentAttn_Med_1	2.82601	3.53945					LH_SalVentAttn_Med_1	0.64758	4.1782						LH_SalVentAttn_Med_1	1.80795
	LH_SalVentAttn_Med_2	2.41409	4.73698					LH_SalVentAttn_Med_2	0.425043	4.89896						LH_SalVentAttn_Med_2	-0.637281
	LH_SalVentAttn_Med_3	3.1048	5.3123					LH_SalVentAttn_Med_3	0.143826	5.90083						LH_SalVentAttn_Med_3	0.688907
	LH_Limbic_OFC_1	2.9392	3.53638					LH_Limbic_OFC_1	0.588116	1.61546						LH_Limbic_OFC_1	-0.109664
	LH_Limbic_OFC_2	2.56881	5.36462					LH_Limbic_OFC_2	0.620372	2.18045						LH_Limbic_OFC_2	-0.348064
	LH_Limbic_TempPole_1	3.18079	0.433925					LH_Limbic_TempPole_1	0.664046	-0.369664						LH_Limbic_TempPole_1	0.0979141
	LH_Limbic_TempPole_2	2.89939	3.64509					LH_Limbic_TempPole_2	0.75959	1.563						LH_Limbic_TempPole_2	-1.01451
	LH_Limbic_TempPole_3	3.69461	-0.614681					LH_Limbic_TempPole_3	0.352802	0.107643						LH_Limbic_TempPole_3	0.886118
	LH_Limbic_TempPole_4	3.30792	-0.27928					LH_Limbic_TempPole_4	0.252833	2.81845						LH_Limbic_TempPole_4	0.338266
	LH_Cont_Par_1	2.82499	2.18193					LH_Cont_Par_1	0.25222	3.57907						LH_Cont_Par_1	-2.13576
	LH_Cont_Par_2	2.51073	4.963					LH_Cont_Par_2	0.276763	6.43925						LH_Cont_Par_2	-2.01526
	LH_Cont_Par_3	2.61753	3.34541					LH_Cont_Par_3	0.275332	4.53623						LH_Cont_Par_3	-0.104093
	LH_Cont_Temp_1	3.06394	2.37312					LH_Cont_Temp_1	0.757928	2.66897						LH_Cont_Temp_1	-0.0744886
	LH_Cont_OFC_1	2.62888	4.84939					LH_Cont_OFC_1	0.607698	2.58354						LH_Cont_OFC_1	1.51346
	LH_Cont_PFCl_1	2.75735	4.67889					LH_Cont_PFCl_1	0.484683	3.47945						LH_Cont_PFCl_1	2.73179
	LH_Cont_PFCl_2	2.45135	4.25227					LH_Cont_PFCl_2	0.511316	4.92535						LH_Cont_PFCl_2	1.8622
	LH_Cont_PFCl_3	2.61067	6.19307					LH_Cont_PFCl_3	0.433346	4.55403						LH_Cont_PFCl_3	3.03865
	LH_Cont_PFCl_4	2.61635	6.01432					LH_Cont_PFCl_4	0.437325	6.83121						LH_Cont_PFCl_4	2.30767
	LH_Cont_PFCl_5	2.72627	3.3597					LH_Cont_PFCl_5	0.404988	5.83415						LH_Cont_PFCl_5	0.0505959
	LH_Cont_pCun_1	2.47363	2.80467					LH_Cont_pCun_1	0.246179	5.50639						LH_Cont_pCun_1	-0.790841
	LH_Cont_Cing_1	0.972395	0.240073					LH_Cont_Cing_1	0.536248	2.66373						LH_Cont_Cing_1	1.76771
	LH_Cont_Cing_2	1.2351	2.16585					LH_Cont_Cing_2	0.615839	1.8566						LH_Cont_Cing_2	-0.225914
	LH_Default_Temp_1	3.29914	1.94714					LH_Default_Temp_1	0.555922	1.14989						LH_Default_Temp_1	-0.417999
	LH_Default_Temp_2	3.17298	4.33651					LH_Default_Temp_2	0.741876	2.99667						LH_Default_Temp_2	-1.51417
	LH_Default_Temp_3	3.01432	4.12756					LH_Default_Temp_3	0.54933	3.3749						LH_Default_Temp_3	-1.5789
	LH_Default_Temp_4	2.82272	5.01962					LH_Default_Temp_4	0.751562	4.20227						LH_Default_Temp_4	-1.11501
	LH_Default_Temp_5	2.87525	4.13775					LH_Default_Temp_5	0.580839	3.91586						LH_Default_Temp_5	0.153821
	LH_Default_Par_1	2.6672	3.73548					LH_Default_Par_1	0.573069	4.64851						LH_Default_Par_1	1.58271
	LH_Default_Par_2	2.84536	4.21607					LH_Default_Par_2	0.398984	3.79649						LH_Default_Par_2	0.843748
	LH_Default_Par_3	3.01597	3.26782					LH_Default_Par_3	0.478583	4.51271						LH_Default_Par_3	-1.89197
	LH_Default_Par_4	2.83122	4.22178					LH_Default_Par_4	0.342468	3.98543						LH_Default_Par_4	-0.115065
	LH_Default_PFC_1	3.24795	3.89767					LH_Default_PFC_1	0.440847	0.644293						LH_Default_PFC_1	0.0962779
	LH_Default_PFC_2	2.48135	3.66608					LH_Default_PFC_2	0.747417	3.72349						LH_Default_PFC_2	-0.0034208
	LH_Default_PFC_3	2.80173	5.30422					LH_Default_PFC_3	0.429433	3.33203						LH_Default_PFC_3	2.58557
	LH_Default_PFC_4	2.72603	4.23128					LH_Default_PFC_4	0.565012	4.73462						LH_Default_PFC_4	0.426791
	LH_Default_PFC_5	2.88703	4.2214					LH_Default_PFC_5	0.305021	3.02646						LH_Default_PFC_5	1.30844
	LH_Default_PFC_6	2.60441	2.80991					LH_Default_PFC_6	0.802796	2.74179						LH_Default_PFC_6	-0.305261
	LH_Default_PFC_7	2.95481	5.18977					LH_Default_PFC_7	0.542049	4.50121						LH_Default_PFC_7	1.18236
	LH_Default_PFC_8	2.45561	2.60322					LH_Default_PFC_8	0.788726	2.50855						LH_Default_PFC_8	0.00669337
	LH_Default_PFC_9	3.20493	6.1582					LH_Default_PFC_9	0.29339	5.59861						LH_Default_PFC_9	3.54801
	LH_Default_PFC_10	3.23173	4.86491					LH_Default_PFC_10	0.47255	4.70762						LH_Default_PFC_10	2.46977
	LH_Default_PFC_11	3.03791	4.28855					LH_Default_PFC_11	0.174609	5.61873						LH_Default_PFC_11	1.60565
	LH_Default_PFC_12	2.78264	5.30166					LH_Default_PFC_12	0.429507	6.67471						LH_Default_PFC_12	1.81063
	LH_Default_PFC_13	3.30147	5.15938					LH_Default_PFC_13	0.0991552	5.68039						LH_Default_PFC_13	2.37247
	LH_Default_pCunPCC_1	2.58558	2.79953					LH_Default_pCunPCC_1	0.522616	5.09133						LH_Default_pCunPCC_1	-0.678022
	LH_Default_pCunPCC_2	2.72178	2.75988					LH_Default_pCunPCC_2	0.610821	4.27324						LH_Default_pCunPCC_2	1.50576
	LH_Default_pCunPCC_3	3.03072	3.48644					LH_Default_pCunPCC_3	0.81094	3.85581						LH_Default_pCunPCC_3	1.53384
	LH_Default_pCunPCC_4	2.54964	3.99933					LH_Default_pCunPCC_4	0.438344	5.90577						LH_Default_pCunPCC_4	-0.105268
	LH_Default_PHC_1	2.54118	1.84358					LH_Default_PHC_1	0.660205	2.48704						LH_Default_PHC_1	-0.484825
	RH_Vis_1	2.85671	4.59158					RH_Vis_1	0.714198	2.51278						RH_Vis_1	-1.52953
	RH_Vis_2	2.42633	1.65883					RH_Vis_2	0.675274	2.97477						RH_Vis_2	-1.4313
	RH_Vis_3	2.57935	4.40411					RH_Vis_3	0.449124	2.76803						RH_Vis_3	-1.27606
	RH_Vis_4	2.54338	1.5485					RH_Vis_4	0.337318	4.30914						RH_Vis_4	0.111557
	RH_Vis_5	2.77344	2.07573					RH_Vis_5	0.435372	3.21889						RH_Vis_5	-1.20712
	RH_Vis_6	2.21045	3.36674					RH_Vis_6	0.0616534	2.85355						RH_Vis_6	-0.248839
	RH_Vis_7	2.29977	2.94695					RH_Vis_7	0.405079	4.804						RH_Vis_7	-0.642211
	RH_Vis_8	2.42679	3.26924					RH_Vis_8	0.242193	1.60996						RH_Vis_8	-1.16668
	RH_Vis_9	2.19767	2.10952					RH_Vis_9	-0.0375407	2.3793						RH_Vis_9	-0.00643421
	RH_Vis_10	2.28586	3.9992					RH_Vis_10	0.249735	1.21862						RH_Vis_10	-1.08279
	RH_Vis_11	2.54256	3.57358					RH_Vis_11	0.426792	3.61947						RH_Vis_11	-0.307861
	RH_Vis_12	2.29322	3.33952					RH_Vis_12	0.191267	3.63022						RH_Vis_12	-0.244087
	RH_Vis_13	2.24408	3.2729					RH_Vis_13	0.157443	3.84665						RH_Vis_13	0.0089846
	RH_Vis_14	2.46562	3.56553					RH_Vis_14	0.096896	2.58805						RH_Vis_14	1.14742
	RH_Vis_15	2.40937	4.18306					RH_Vis_15	0.377349	4.82231						RH_Vis_15	-0.57515
	RH_SomMot_1	2.79744	2.21845					RH_SomMot_1	0.105172	4.9416						RH_SomMot_1	0.25582
	RH_SomMot_2	3.13075	2.63258					RH_SomMot_2	0.313038	4.85785						RH_SomMot_2	-0.585243
	RH_SomMot_3	2.76838	4.31846					RH_SomMot_3	0.385243	3.28651						RH_SomMot_3	1.58292
	RH_SomMot_4	2.6957	3.44764					RH_SomMot_4	0.325652	3.84528						RH_SomMot_4	0.712772
	RH_SomMot_5	2.99048	3.77209					RH_SomMot_5	0.4009	1.96891						RH_SomMot_5	0.431664
	RH_SomMot_6	2.96157	2.16998					RH_SomMot_6	0.509651	1.48153						RH_SomMot_6	1.27437
	RH_SomMot_7	2.42868	1.00356					RH_SomMot_7	0.0589248	5.22721						RH_SomMot_7	-0.811912
	RH_SomMot_8	2.65079	3.47877					RH_SomMot_8	0.595325	4.47365						RH_SomMot_8	0.545767
	RH_SomMot_9	2.50322	2.93001					RH_SomMot_9	0.101386	3.46991						RH_SomMot_9	0.840177
	RH_SomMot_10	2.46626	1.84622					RH_SomMot_10	-0.0921482	5.56852						RH_SomMot_10	-1.00517
	RH_SomMot_11	2.88271	3.15613					RH_SomMot_11	0.367092	5.30405						RH_SomMot_11	1.95216
	RH_SomMot_12	1.95767	2.2962					RH_SomMot_12	-0.0628982	4.11079						RH_SomMot_12	-0.938804
	RH_SomMot_13	2.40889	2.46715					RH_SomMot_13	0.0436963	2.62642						RH_SomMot_13	2.0008
	RH_SomMot_14	2.82796	1.93139					RH_SomMot_14	-0.28521	5.55541						RH_SomMot_14	-2.02085
	RH_SomMot_15	2.25784	2.0474					RH_SomMot_15	-0.0895601	3.67113						RH_SomMot_15	0.812792
	RH_SomMot_16	2.81401	3.52225					RH_SomMot_16	0.139792	8.51148						RH_SomMot_16	-2.08484
	RH_SomMot_17	2.32722	3.29097					RH_SomMot_17	-0.100464	1.85989						RH_SomMot_17	-0.737968
	RH_SomMot_18	2.82139	3.19316					RH_SomMot_18	-0.227401	4.47014						RH_SomMot_18	-1.07586
	RH_SomMot_19	1.71377	0.885062					RH_SomMot_19	-0.137756	2.53919						RH_SomMot_19	-1.74515
	RH_DorsAttn_Post_1	2.76967	3.81386					RH_DorsAttn_Post_1	0.647975	3.51094						RH_DorsAttn_Post_1	-1.29147
	RH_DorsAttn_Post_2	2.64799	4.46145					RH_DorsAttn_Post_2	0.510905	4.52019						RH_DorsAttn_Post_2	-1.31665
	RH_DorsAttn_Post_3	2.76624	2.17506					RH_DorsAttn_Post_3	0.345693	4.24704						RH_DorsAttn_Post_3	-0.424625
	RH_DorsAttn_Post_4	2.62329	2.90674					RH_DorsAttn_Post_4	0.346838	5.41331						RH_DorsAttn_Post_4	1.02044
	RH_DorsAttn_Post_5	2.40036	2.69648					RH_DorsAttn_Post_5	0.3359	5.2178						RH_DorsAttn_Post_5	1.01627
	RH_DorsAttn_Post_6	2.53745	2.01584					RH_DorsAttn_Post_6	0.106815	4.89227						RH_DorsAttn_Post_6	0.668032
	RH_DorsAttn_Post_7	2.34556	4.33892					RH_DorsAttn_Post_7	0.202468	5.26954						RH_DorsAttn_Post_7	1.39842
	RH_DorsAttn_Post_8	2.42069	4.99492					RH_DorsAttn_Post_8	0.0490012	4.84903						RH_DorsAttn_Post_8	0.0649191
	RH_DorsAttn_Post_9	2.64084	4.1499					RH_DorsAttn_Post_9	0.180867	4.26497						RH_DorsAttn_Post_9	-0.0214954
	RH_DorsAttn_Post_10	2.47368	4.19895					RH_DorsAttn_Post_10	-0.00339028	3.29675						RH_DorsAttn_Post_10	0.621588
	RH_DorsAttn_FEF_1	2.74301	3.06719					RH_DorsAttn_FEF_1	0.328236	7.0951						RH_DorsAttn_FEF_1	-1.79772
	RH_DorsAttn_FEF_2	2.79656	4.74492					RH_DorsAttn_FEF_2	0.33677	6.00947						RH_DorsAttn_FEF_2	1.2733
	RH_DorsAttn_PrCv_1	2.80555	4.39585					RH_DorsAttn_PrCv_1	0.507561	5.21982						RH_DorsAttn_PrCv_1	1.08157
	RH_SalVentAttn_TempOccPar_1	2.85285	4.0594					RH_SalVentAttn_TempOccPar_1	0.5637	3.15323						RH_SalVentAttn_TempOccPar_1	0.388334
	RH_SalVentAttn_TempOccPar_2	2.85522	3.50464					RH_SalVentAttn_TempOccPar_2	0.598689	3.90826						RH_SalVentAttn_TempOccPar_2	0.576163
	RH_SalVentAttn_TempOccPar_3	2.87351	3.91003					RH_SalVentAttn_TempOccPar_3	0.419095	3.98241						RH_SalVentAttn_TempOccPar_3	0.0532025
	RH_SalVentAttn_PrC_1	2.92637	2.62152					RH_SalVentAttn_PrC_1	0.307441	4.91945						RH_SalVentAttn_PrC_1	0.371183
	RH_SalVentAttn_FrOperIns_1	3.41526	0.530384					RH_SalVentAttn_FrOperIns_1	0.174505	2.50484						RH_SalVentAttn_FrOperIns_1	-0.389825
	RH_SalVentAttn_FrOperIns_2	3.33805	2.14629					RH_SalVentAttn_FrOperIns_2	0.260568	3.38388						RH_SalVentAttn_FrOperIns_2	-0.271937
	RH_SalVentAttn_FrOperIns_3	2.78291	4.5554					RH_SalVentAttn_FrOperIns_3	0.620186	4.32055						RH_SalVentAttn_FrOperIns_3	2.3802
	RH_SalVentAttn_FrOperIns_4	3.15777	4.20732					RH_SalVentAttn_FrOperIns_4	0.586469	2.78655						RH_SalVentAttn_FrOperIns_4	1.83613
	RH_SalVentAttn_Med_1	2.90356	2.87529					RH_SalVentAttn_Med_1	0.650712	4.67823						RH_SalVentAttn_Med_1	2.95767
	RH_SalVentAttn_Med_2	2.45053	4.84585					RH_SalVentAttn_Med_2	0.45806	4.61282						RH_SalVentAttn_Med_2	-1.50754
	RH_SalVentAttn_Med_3	3.14459	4.38025					RH_SalVentAttn_Med_3	0.0890066	5.9609						RH_SalVentAttn_Med_3	1.80043
	RH_Limbic_OFC_1	2.4877	5.32999					RH_Limbic_OFC_1	0.675662	2.93478						RH_Limbic_OFC_1	-0.826539
	RH_Limbic_OFC_2	2.97932	4.74296					RH_Limbic_OFC_2	0.640824	2.18821						RH_Limbic_OFC_2	-0.97649
	RH_Limbic_OFC_3	2.81714	5.04789					RH_Limbic_OFC_3	0.541545	3.94447						RH_Limbic_OFC_3	0.501475
	RH_Limbic_TempPole_1	3.46306	-0.819007					RH_Limbic_TempPole_1	0.465773	1.23718						RH_Limbic_TempPole_1	1.21151
	RH_Limbic_TempPole_2	3.00478	4.60086					RH_Limbic_TempPole_2	0.712603	2.72122						RH_Limbic_TempPole_2	-1.11074
	RH_Limbic_TempPole_3	3.10215	0.148903					RH_Limbic_TempPole_3	0.551268	0.34183						RH_Limbic_TempPole_3	-1.61953
	RH_Cont_Par_1	3.02501	3.82512					RH_Cont_Par_1	0.407946	4.65113						RH_Cont_Par_1	-0.572591
	RH_Cont_Par_2	2.63036	3.26642					RH_Cont_Par_2	0.33874	4.12056						RH_Cont_Par_2	1.47624
	RH_Cont_Par_3	2.50652	3.32229					RH_Cont_Par_3	0.291773	6.05268						RH_Cont_Par_3	0.686757
	RH_Cont_Temp_1	3.09945	3.20999					RH_Cont_Temp_1	0.727854	2.6976						RH_Cont_Temp_1	-0.392379
	RH_Cont_PFCv_1	3.22793	2.81057					RH_Cont_PFCv_1	0.550077	1.30183						RH_Cont_PFCv_1	0.151037
	RH_Cont_PFCl_1	2.72992	6.44335					RH_Cont_PFCl_1	0.609747	2.78184						RH_Cont_PFCl_1	-0.503075
	RH_Cont_PFCl_2	2.47295	4.12569					RH_Cont_PFCl_2	0.515454	4.37331						RH_Cont_PFCl_2	-0.374791
	RH_Cont_PFCl_3	2.57343	4.97924					RH_Cont_PFCl_3	0.461212	4.27291						RH_Cont_PFCl_3	0.789287
	RH_Cont_PFCl_4	2.59316	4.26303					RH_Cont_PFCl_4	0.447785	4.41498						RH_Cont_PFCl_4	2.02954
	RH_Cont_PFCl_5	2.58594	4.67625					RH_Cont_PFCl_5	0.469363	4.55819						RH_Cont_PFCl_5	1.58107
	RH_Cont_PFCl_6	2.81237	3.47683					RH_Cont_PFCl_6	0.334285	3.26966						RH_Cont_PFCl_6	0.796491
	RH_Cont_PFCl_7	2.90116	5.21497					RH_Cont_PFCl_7	0.237138	6.94747						RH_Cont_PFCl_7	1.55181
	RH_Cont_pCun_1	2.39639	3.00671					RH_Cont_pCun_1	0.301776	4.63964						RH_Cont_pCun_1	-0.0103767
	RH_Cont_Cing_1	1.32117	1.54862					RH_Cont_Cing_1	0.610007	3.34444						RH_Cont_Cing_1	1.13929
	RH_Cont_Cing_2	1.06556	1.74467					RH_Cont_Cing_2	0.694414	2.16628						RH_Cont_Cing_2	-0.426531
	RH_Cont_PFCmp_1	3.00338	3.60949					RH_Cont_PFCmp_1	0.753223	3.0873						RH_Cont_PFCmp_1	2.36554
	RH_Cont_PFCmp_2	3.32651	5.43456					RH_Cont_PFCmp_2	0.153068	5.18722						RH_Cont_PFCmp_2	2.59301
	RH_Default_Par_1	2.79695	4.29719					RH_Default_Par_1	0.437782	4.07199						RH_Default_Par_1	-0.458584
	RH_Default_Par_2	2.75584	4.52071					RH_Default_Par_2	0.52035	3.73054						RH_Default_Par_2	0.0771471
	RH_Default_Par_3	2.93524	3.66945					RH_Default_Par_3	0.302961	3.11321						RH_Default_Par_3	0.817277
	RH_Default_Temp_1	3.32869	1.01312					RH_Default_Temp_1	0.449505	1.35892						RH_Default_Temp_1	-1.53322
	RH_Default_Temp_2	3.1668	4.59178					RH_Default_Temp_2	0.717207	3.23045						RH_Default_Temp_2	-0.668567
	RH_Default_Temp_3	2.92513	4.35953					RH_Default_Temp_3	0.559239	2.11515						RH_Default_Temp_3	-0.882939
	RH_Default_Temp_4	3.1729	3.71287					RH_Default_Temp_4	0.701496	4.50234						RH_Default_Temp_4	-0.859271
	RH_Default_Temp_5	2.69042	4.32708					RH_Default_Temp_5	0.676174	3.60832						RH_Default_Temp_5	-0.0986411
	RH_Default_PFCv_1	2.86409	7.01139					RH_Default_PFCv_1	0.413273	4.28609						RH_Default_PFCv_1	1.11875
	RH_Default_PFCdPFCm_1	2.65983	4.90316					RH_Default_PFCdPFCm_1	0.609829	3.00953						RH_Default_PFCdPFCm_1	-1.02316
	RH_Default_PFCdPFCm_2	2.7503	3.04096					RH_Default_PFCdPFCm_2	0.84446	3.50454						RH_Default_PFCdPFCm_2	0.917632
	RH_Default_PFCdPFCm_3	1.25141	1.14441					RH_Default_PFCdPFCm_3	0.812954	1.92648						RH_Default_PFCdPFCm_3	0.761371
	RH_Default_PFCdPFCm_4	3.04305	6.18362					RH_Default_PFCdPFCm_4	0.461183	4.28766						RH_Default_PFCdPFCm_4	0.887602
	RH_Default_PFCdPFCm_5	3.09972	5.15868					RH_Default_PFCdPFCm_5	0.237176	4.88567						RH_Default_PFCdPFCm_5	2.71667
	RH_Default_PFCdPFCm_6	2.74264	5.29739					RH_Default_PFCdPFCm_6	0.458768	4.94723						RH_Default_PFCdPFCm_6	2.09614
	RH_Default_PFCdPFCm_7	2.87376	4.30976					RH_Default_PFCdPFCm_7	0.321822	5.77262						RH_Default_PFCdPFCm_7	1.7559
	RH_Default_pCunPCC_1	2.6215	3.3824					RH_Default_pCunPCC_1	0.591339	3.87257						RH_Default_pCunPCC_1	-0.0330029
	RH_Default_pCunPCC_2	2.64493	3.3129					RH_Default_pCunPCC_2	0.693968	4.46941						RH_Default_pCunPCC_2	0.141625
	RH_Default_pCunPCC_3	2.508	4.0673					RH_Default_pCunPCC_3	0.445235	3.5899						RH_Default_pCunPCC_3	-1.00343
