# Supplementary material for: An expanding manifold in transmodal regions characterizes adolescent reconfiguration of structural connectome organization
Source: eLife. 2021 Mar 31;10:e64694. doi: 10.7554/eLife.64694 (PMC8087442; doi:10.7554/eLife.64694)
Supplement: Figure 3—source data 1. [file elife-64694-fig3-data1.xlsx]

## Sheet: Figure 3
3
	Region	T-statistic
	Accumbens	0.222683
	Amygdala	-0.619418
	Caudate	4.15451
	Hippocampus	1.6423
	Pallidum	1.77012
	Putamen	1.90815
	Thalamus	2.4961
