# Supplementary material for: An expanding manifold in transmodal regions characterizes adolescent reconfiguration of structural connectome organization
Source: eLife. 2021 Mar 31;10:e64694. doi: 10.7554/eLife.64694 (PMC8087442; doi:10.7554/eLife.64694)
Supplement: Figure 4—source data 1. [file elife-64694-fig4-data1.xlsx]

## Sheet: Figure 4
4B
	p-values	Early Fetal	Early/Mid Fetal	Late/Mid Fetal	Late Fetal	Early Infancy	Late Infancy	Early Childhood	Mid/Late Childhood	Adolescence	Young Adulthood
	Cortex	0.48	0.133	0.401	0.009	0.008	0.16	0.002	7.11e-10	4.42e-22	7.12e-32
	Thalamus	0.107	0.053	0.457	0.002	2.41e-08	2.52e-06	4.35e-07	7.12e-06	9.56e-09	7.69e-09
	Striatum	0.72	0.029	0.48	0.46	0.006	0.17	0.224	0.008	0.6	0.706
	Cerebellum	0.025	0.086	0.344	0.244	0.002	0.401	0.000207	0.000514	7.69e-09	2.62e-09
	Hippocampus	0.414	0.6	0.853	0.956	0.34	0.164	0.921	0.6	0.172	0.113
	Amygdala	0.706	0.566	0.765	0.49	0.16	0.244	0.401	0.143	0.244	0.114
