# Supplementary material for: An expanding manifold in transmodal regions characterizes adolescent reconfiguration of structural connectome organization
Source: eLife. 2021 Mar 31;10:e64694. doi: 10.7554/eLife.64694 (PMC8087442; doi:10.7554/eLife.64694)
Supplement: Figure 5—source data 1. [file elife-64694-fig5-data1.xlsx]

## Sheet: Figure 5
5A													5B
	Region	Probability	IQ	Cortical & Baseline			Region	Probability	IQ	Cortical & Baseline + Follow-up				Region	Probability	IQ	Cortical + Subcortical & Baseline			Region	Probability	IQ	Cortical + Subcortical & Baseline + Follow-up
				Actual	Predicted					Actual	Predicted						Actual	Predicted					Actual	Predicted
	LH_Vis_1	0	Subject #1	127	109.524		LH_Vis_1	0	Subject #1	127	112.039			LH_Vis_1	0	Subject #1	127	109.816		LH_Vis_1	0	Subject #1	127	110.676
	LH_Vis_2	0.825	Subject #2	111	105.204		LH_Vis_2	0.985	Subject #2	111	104.527			LH_Vis_2	0.795	Subject #2	111	105.656		LH_Vis_2	0.495	Subject #2	111	105.126
	LH_Vis_3	0	Subject #3	115	113.506		LH_Vis_3	0	Subject #3	115	109.474			LH_Vis_3	0	Subject #3	115	112.489		LH_Vis_3	0	Subject #3	115	108.917
	LH_Vis_4	0	Subject #4	111	112.773		LH_Vis_4	0	Subject #4	111	114.481			LH_Vis_4	0	Subject #4	111	112.342		LH_Vis_4	0	Subject #4	111	113.915
	LH_Vis_5	0	Subject #5	109	108.57		LH_Vis_5	0	Subject #5	109	111.548			LH_Vis_5	0	Subject #5	109	108.396		LH_Vis_5	0	Subject #5	109	111.785
	LH_Vis_6	0	Subject #6	100	110.096		LH_Vis_6	0	Subject #6	100	108.687			LH_Vis_6	0	Subject #6	100	109.31		LH_Vis_6	0	Subject #6	100	108.859
	LH_Vis_7	0	Subject #7	109	108.737		LH_Vis_7	0	Subject #7	109	107.484			LH_Vis_7	0	Subject #7	109	109.111		LH_Vis_7	0	Subject #7	109	107.395
	LH_Vis_8	0	Subject #8	98	113.101		LH_Vis_8	0	Subject #8	98	116.709			LH_Vis_8	0	Subject #8	98	113.132		LH_Vis_8	0	Subject #8	98	116.724
	LH_Vis_9	0	Subject #9	111	112.213		LH_Vis_9	0	Subject #9	111	110.244			LH_Vis_9	0	Subject #9	111	112.144		LH_Vis_9	0	Subject #9	111	109.345
	LH_Vis_10	0	Subject #10	114	107.864		LH_Vis_10	0	Subject #10	114	104.435			LH_Vis_10	0	Subject #10	114	108.061		LH_Vis_10	0	Subject #10	114	105.508
	LH_Vis_11	0.082	Subject #11	96	108.98		LH_Vis_11	0.142	Subject #11	96	108.652			LH_Vis_11	0.066	Subject #11	96	108.415		LH_Vis_11	0.095	Subject #11	96	108.364
	LH_Vis_12	0	Subject #12	93	107.191		LH_Vis_12	0	Subject #12	93	108.447			LH_Vis_12	0	Subject #12	93	107.247		LH_Vis_12	0	Subject #12	93	108.084
	LH_Vis_13	0	Subject #13	107	108.285		LH_Vis_13	0	Subject #13	107	106.684			LH_Vis_13	0	Subject #13	107	108.401		LH_Vis_13	0	Subject #13	107	107.545
	LH_Vis_14	0	Subject #14	102	109.384		LH_Vis_14	0	Subject #14	102	109.004			LH_Vis_14	0	Subject #14	102	109.123		LH_Vis_14	0	Subject #14	102	108.626
	LH_SomMot_1	0	Subject #15	112	110.284		LH_SomMot_1	0	Subject #15	112	111.158			LH_SomMot_1	0	Subject #15	112	110.863		LH_SomMot_1	0	Subject #15	112	110.594
	LH_SomMot_2	0	Subject #16	109	107.446		LH_SomMot_2	0	Subject #16	109	107.454			LH_SomMot_2	0	Subject #16	109	107.781		LH_SomMot_2	0	Subject #16	109	107.739
	LH_SomMot_3	0	Subject #17	95	108.235		LH_SomMot_3	0	Subject #17	95	104.464			LH_SomMot_3	0	Subject #17	95	108.023		LH_SomMot_3	0	Subject #17	95	104.217
	LH_SomMot_4	0	Subject #18	99	111.006		LH_SomMot_4	0	Subject #18	99	108.736			LH_SomMot_4	0	Subject #18	99	110.415		LH_SomMot_4	0	Subject #18	99	108.577
	LH_SomMot_5	0	Subject #19	109	104.823		LH_SomMot_5	0	Subject #19	109	106.232			LH_SomMot_5	0	Subject #19	109	105.348		LH_SomMot_5	0	Subject #19	109	104.901
	LH_SomMot_6	0	Subject #20	106	112.946		LH_SomMot_6	0	Subject #20	106	113.992			LH_SomMot_6	0	Subject #20	106	114.32		LH_SomMot_6	0	Subject #20	106	115.397
	LH_SomMot_7	0	Subject #21	104	107.689		LH_SomMot_7	0	Subject #21	104	108.75			LH_SomMot_7	0	Subject #21	104	108.206		LH_SomMot_7	0	Subject #21	104	109.598
	LH_SomMot_8	0	Subject #22	111	108.275		LH_SomMot_8	0	Subject #22	111	107.756			LH_SomMot_8	0	Subject #22	111	108.605		LH_SomMot_8	0	Subject #22	111	108.366
	LH_SomMot_9	0	Subject #23	109	115.746		LH_SomMot_9	0	Subject #23	109	118.06			LH_SomMot_9	0	Subject #23	109	116.071		LH_SomMot_9	0	Subject #23	109	117.868
	LH_SomMot_10	0	Subject #24	107	118.191		LH_SomMot_10	0	Subject #24	107	120.37			LH_SomMot_10	0	Subject #24	107	117.801		LH_SomMot_10	0	Subject #24	107	118.784
	LH_SomMot_11	0	Subject #25	104	111.541		LH_SomMot_11	0	Subject #25	104	106.207			LH_SomMot_11	0	Subject #25	104	111.23		LH_SomMot_11	0	Subject #25	104	106.054
	LH_SomMot_12	0	Subject #26	129	113.769		LH_SomMot_12	0	Subject #26	129	113.123			LH_SomMot_12	0	Subject #26	129	113.027		LH_SomMot_12	0	Subject #26	129	112.199
	LH_SomMot_13	0	Subject #27	121	118.374		LH_SomMot_13	0	Subject #27	121	113.262			LH_SomMot_13	0	Subject #27	121	117.879		LH_SomMot_13	0	Subject #27	121	111.93
	LH_SomMot_14	0	Subject #28	107	105.385		LH_SomMot_14	0	Subject #28	107	105.202			LH_SomMot_14	0	Subject #28	107	106.294		LH_SomMot_14	0	Subject #28	107	106.066
	LH_SomMot_15	0	Subject #29	110	108.5		LH_SomMot_15	0	Subject #29	110	105.748			LH_SomMot_15	0	Subject #29	110	108.389		LH_SomMot_15	0	Subject #29	110	105.517
	LH_SomMot_16	0	Subject #30	123	110.511		LH_SomMot_16	0	Subject #30	123	111.738			LH_SomMot_16	0	Subject #30	123	110.744		LH_SomMot_16	0	Subject #30	123	111.047
	LH_DorsAttn_Post_1	0	Subject #31	107	106.451		LH_DorsAttn_Post_1	0	Subject #31	107	108.781			LH_DorsAttn_Post_1	0	Subject #31	107	107.543		LH_DorsAttn_Post_1	0	Subject #31	107	108.57
	LH_DorsAttn_Post_2	0	Subject #32	109	113.761		LH_DorsAttn_Post_2	0	Subject #32	109	115.11			LH_DorsAttn_Post_2	0	Subject #32	109	113.893		LH_DorsAttn_Post_2	0	Subject #32	109	115.533
	LH_DorsAttn_Post_3	0	Subject #33	109	114.458		LH_DorsAttn_Post_3	0	Subject #33	109	118.674			LH_DorsAttn_Post_3	0	Subject #33	109	114.79		LH_DorsAttn_Post_3	0	Subject #33	109	116.196
	LH_DorsAttn_Post_4	0	Subject #34	99	115.209		LH_DorsAttn_Post_4	0	Subject #34	99	116.756			LH_DorsAttn_Post_4	0	Subject #34	99	116.32		LH_DorsAttn_Post_4	0	Subject #34	99	117.777
	LH_DorsAttn_Post_5	0	Subject #35	108	105.133		LH_DorsAttn_Post_5	0	Subject #35	108	104.066			LH_DorsAttn_Post_5	0	Subject #35	108	105.588		LH_DorsAttn_Post_5	0	Subject #35	108	105.024
	LH_DorsAttn_Post_6	0	Subject #36	120	121.857		LH_DorsAttn_Post_6	0	Subject #36	120	120.692			LH_DorsAttn_Post_6	0	Subject #36	120	122.14		LH_DorsAttn_Post_6	0	Subject #36	120	120.295
	LH_DorsAttn_Post_7	0	Subject #37	102	107.419		LH_DorsAttn_Post_7	0	Subject #37	102	109.17			LH_DorsAttn_Post_7	0	Subject #37	102	107.898		LH_DorsAttn_Post_7	0	Subject #37	102	108.67
	LH_DorsAttn_Post_8	0	Subject #38	104	115.987		LH_DorsAttn_Post_8	0	Subject #38	104	114.85			LH_DorsAttn_Post_8	0	Subject #38	104	115.755		LH_DorsAttn_Post_8	0	Subject #38	104	114.031
	LH_DorsAttn_Post_9	0	Subject #39	117	117.13		LH_DorsAttn_Post_9	0	Subject #39	117	116.068			LH_DorsAttn_Post_9	0	Subject #39	117	116.273		LH_DorsAttn_Post_9	0	Subject #39	117	115.089
	LH_DorsAttn_Post_10	0	Subject #40	108	109.798		LH_DorsAttn_Post_10	0	Subject #40	108	108.243			LH_DorsAttn_Post_10	0	Subject #40	108	109.79		LH_DorsAttn_Post_10	0	Subject #40	108	108.236
	LH_DorsAttn_FEF_1	0	Subject #41	114	110.076		LH_DorsAttn_FEF_1	0	Subject #41	114	108.882			LH_DorsAttn_FEF_1	0	Subject #41	114	109.648		LH_DorsAttn_FEF_1	0	Subject #41	114	108.224
	LH_DorsAttn_FEF_2	0	Subject #42	122	106.974		LH_DorsAttn_FEF_2	0	Subject #42	122	108.548			LH_DorsAttn_FEF_2	0	Subject #42	122	107.721		LH_DorsAttn_FEF_2	0	Subject #42	122	109.209
	LH_DorsAttn_PrCv_1	0	Subject #43	116	109.643		LH_DorsAttn_PrCv_1	0	Subject #43	116	108.948			LH_DorsAttn_PrCv_1	0	Subject #43	116	109.553		LH_DorsAttn_PrCv_1	0	Subject #43	116	110.238
	LH_SalVentAttn_ParOper_1	0	Subject #44	110	115.476		LH_SalVentAttn_ParOper_1	0	Subject #44	110	117.91			LH_SalVentAttn_ParOper_1	0	Subject #44	110	115.322		LH_SalVentAttn_ParOper_1	0	Subject #44	110	117.112
	LH_SalVentAttn_ParOper_2	0	Subject #45	103	115.733		LH_SalVentAttn_ParOper_2	0	Subject #45	103	114.71			LH_SalVentAttn_ParOper_2	0	Subject #45	103	115.608		LH_SalVentAttn_ParOper_2	0	Subject #45	103	114.116
	LH_SalVentAttn_ParOper_3	0	Subject #46	115	117.528		LH_SalVentAttn_ParOper_3	0	Subject #46	115	118.091			LH_SalVentAttn_ParOper_3	0	Subject #46	115	117.215		LH_SalVentAttn_ParOper_3	0	Subject #46	115	117.403
	LH_SalVentAttn_FrOperIns_1	0	Subject #47	121	111.416		LH_SalVentAttn_FrOperIns_1	0	Subject #47	121	112.074			LH_SalVentAttn_FrOperIns_1	0	Subject #47	121	112.6		LH_SalVentAttn_FrOperIns_1	0	Subject #47	121	112.25
	LH_SalVentAttn_FrOperIns_2	0	Subject #48	115	112.821		LH_SalVentAttn_FrOperIns_2	0	Subject #48	115	115.721			LH_SalVentAttn_FrOperIns_2	0	Subject #48	115	111.796		LH_SalVentAttn_FrOperIns_2	0	Subject #48	115	115.491
	LH_SalVentAttn_FrOperIns_3	0	Subject #49	119	115.676		LH_SalVentAttn_FrOperIns_3	0	Subject #49	119	119.704			LH_SalVentAttn_FrOperIns_3	0	Subject #49	119	114.605		LH_SalVentAttn_FrOperIns_3	0	Subject #49	119	117.633
	LH_SalVentAttn_FrOperIns_4	0	Subject #50	116	113.398		LH_SalVentAttn_FrOperIns_4	0	Subject #50	116	112.974			LH_SalVentAttn_FrOperIns_4	0	Subject #50	116	112.663		LH_SalVentAttn_FrOperIns_4	0	Subject #50	116	113.218
	LH_SalVentAttn_PFCl_1	0.447	Subject #51	103	111.085		LH_SalVentAttn_PFCl_1	0.437	Subject #51	103	110.117			LH_SalVentAttn_PFCl_1	0.387	Subject #51	103	111.389		LH_SalVentAttn_PFCl_1	0.294	Subject #51	103	110.108
	LH_SalVentAttn_Med_1	0	Subject #52	90	110.675		LH_SalVentAttn_Med_1	0	Subject #52	90	109.133			LH_SalVentAttn_Med_1	0	Subject #52	90	110.234		LH_SalVentAttn_Med_1	0	Subject #52	90	108.832
	LH_SalVentAttn_Med_2	0	Subject #53	97	111.712		LH_SalVentAttn_Med_2	0	Subject #53	97	109.031			LH_SalVentAttn_Med_2	0	Subject #53	97	111.48		LH_SalVentAttn_Med_2	0	Subject #53	97	109.253
	LH_SalVentAttn_Med_3	0	Subject #54	115	108.917		LH_SalVentAttn_Med_3	0	Subject #54	115	109.478			LH_SalVentAttn_Med_3	0	Subject #54	115	109.371		LH_SalVentAttn_Med_3	0	Subject #54	115	109.861
	LH_Limbic_OFC_1	0	Subject #55	106	113.608		LH_Limbic_OFC_1	0	Subject #55	106	117.34			LH_Limbic_OFC_1	0	Subject #55	106	113.274		LH_Limbic_OFC_1	0	Subject #55	106	116.61
	LH_Limbic_OFC_2	0	Subject #56	123	112.059		LH_Limbic_OFC_2	0	Subject #56	123	114.618			LH_Limbic_OFC_2	0	Subject #56	123	111.617		LH_Limbic_OFC_2	0	Subject #56	123	113.815
	LH_Limbic_TempPole_1	0	Subject #57	109	123.092		LH_Limbic_TempPole_1	0	Subject #57	109	118.456			LH_Limbic_TempPole_1	0	Subject #57	109	122.099		LH_Limbic_TempPole_1	0	Subject #57	109	119.881
	LH_Limbic_TempPole_2	0	Subject #58	131	118.407		LH_Limbic_TempPole_2	0	Subject #58	131	119.511			LH_Limbic_TempPole_2	0	Subject #58	131	118.46		LH_Limbic_TempPole_2	0	Subject #58	131	118.865
	LH_Limbic_TempPole_3	0	Subject #59	132	106.678		LH_Limbic_TempPole_3	0	Subject #59	132	103.351			LH_Limbic_TempPole_3	0	Subject #59	132	108.49		LH_Limbic_TempPole_3	0	Subject #59	132	106.136
	LH_Limbic_TempPole_4	0	Subject #60	113	113.617		LH_Limbic_TempPole_4	0	Subject #60	113	111.46			LH_Limbic_TempPole_4	0	Subject #60	113	114.276		LH_Limbic_TempPole_4	0	Subject #60	113	111.978
	LH_Cont_Par_1	0	Subject #61	96	115.993		LH_Cont_Par_1	0	Subject #61	96	119.31			LH_Cont_Par_1	0	Subject #61	96	116.22		LH_Cont_Par_1	0	Subject #61	96	119.118
	LH_Cont_Par_2	0	Subject #62	114	107.953		LH_Cont_Par_2	0	Subject #62	114	109.992			LH_Cont_Par_2	0	Subject #62	114	108.151		LH_Cont_Par_2	0	Subject #62	114	110.135
	LH_Cont_Par_3	0	Subject #63	119	109.451		LH_Cont_Par_3	0	Subject #63	119	107.402			LH_Cont_Par_3	0	Subject #63	119	109.37		LH_Cont_Par_3	0	Subject #63	119	107.437
	LH_Cont_Temp_1	0	Subject #64	96	116.93		LH_Cont_Temp_1	0	Subject #64	96	117.702			LH_Cont_Temp_1	0	Subject #64	96	117.224		LH_Cont_Temp_1	0	Subject #64	96	117.477
	LH_Cont_OFC_1	0	Subject #65	89	118.352		LH_Cont_OFC_1	0	Subject #65	89	114.881			LH_Cont_OFC_1	0	Subject #65	89	118.861		LH_Cont_OFC_1	0	Subject #65	89	116.159
	LH_Cont_PFCl_1	0	Subject #66	99	103.974		LH_Cont_PFCl_1	0	Subject #66	99	104.425			LH_Cont_PFCl_1	0	Subject #66	99	104.442		LH_Cont_PFCl_1	0	Subject #66	99	107.011
	LH_Cont_PFCl_2	0.293	Subject #67	112	119.91		LH_Cont_PFCl_2	0.409	Subject #67	112	118.557			LH_Cont_PFCl_2	0.213	Subject #67	112	119.513		LH_Cont_PFCl_2	0.359	Subject #67	112	118.309
	LH_Cont_PFCl_3	0.12	Subject #68	104	109.161		LH_Cont_PFCl_3	0.157	Subject #68	104	111.71			LH_Cont_PFCl_3	0.096	Subject #68	104	109.311		LH_Cont_PFCl_3	0.421	Subject #68	104	111.257
	LH_Cont_PFCl_4	0	Subject #69	120	106.632		LH_Cont_PFCl_4	0	Subject #69	120	112.623			LH_Cont_PFCl_4	0	Subject #69	120	106.191		LH_Cont_PFCl_4	0	Subject #69	120	110.831
	LH_Cont_PFCl_5	0	Subject #70	121	120.428		LH_Cont_PFCl_5	0	Subject #70	121	119.326			LH_Cont_PFCl_5	0	Subject #70	121	120.342		LH_Cont_PFCl_5	0	Subject #70	121	119.468
	LH_Cont_pCun_1	0	Subject #71	128	119.213		LH_Cont_pCun_1	0	Subject #71	128	120.41			LH_Cont_pCun_1	0	Subject #71	128	118.752		LH_Cont_pCun_1	0	Subject #71	128	119.896
	LH_Cont_Cing_1	0	Subject #72	125	103.739		LH_Cont_Cing_1	0	Subject #72	125	103.645			LH_Cont_Cing_1	0	Subject #72	125	103.645		LH_Cont_Cing_1	0	Subject #72	125	103.581
	LH_Cont_Cing_2	0	Subject #73	99	111.984		LH_Cont_Cing_2	0	Subject #73	99	112.067			LH_Cont_Cing_2	0	Subject #73	99	111.411		LH_Cont_Cing_2	0	Subject #73	99	111.793
	LH_Default_Temp_1	0	Subject #74	133	109.545		LH_Default_Temp_1	0	Subject #74	133	111.633			LH_Default_Temp_1	0	Subject #74	133	109.301		LH_Default_Temp_1	0	Subject #74	133	111.541
	LH_Default_Temp_2	0	Subject #75	135	113.901		LH_Default_Temp_2	0	Subject #75	135	115.223			LH_Default_Temp_2	0	Subject #75	135	114.308		LH_Default_Temp_2	0	Subject #75	135	114.287
	LH_Default_Temp_3	0	Subject #76	119	112.294		LH_Default_Temp_3	0	Subject #76	119	112.733			LH_Default_Temp_3	0	Subject #76	119	113.234		LH_Default_Temp_3	0	Subject #76	119	114.348
	LH_Default_Temp_4	0	Subject #77	125	117.002		LH_Default_Temp_4	0	Subject #77	125	114.716			LH_Default_Temp_4	0	Subject #77	125	117.006		LH_Default_Temp_4	0	Subject #77	125	114.537
	LH_Default_Temp_5	0	Subject #78	116	113.175		LH_Default_Temp_5	0	Subject #78	116	114.402			LH_Default_Temp_5	0	Subject #78	116	113.417		LH_Default_Temp_5	0	Subject #78	116	114.698
	LH_Default_Par_1	0	Subject #79	102	111.926		LH_Default_Par_1	0	Subject #79	102	110.933			LH_Default_Par_1	0	Subject #79	102	112.711		LH_Default_Par_1	0	Subject #79	102	111.575
	LH_Default_Par_2	0	Subject #80	126	118.967		LH_Default_Par_2	0	Subject #80	126	119.808			LH_Default_Par_2	0	Subject #80	126	118.709		LH_Default_Par_2	0	Subject #80	126	119.21
	LH_Default_Par_3	0	Subject #81	109	111.755		LH_Default_Par_3	0	Subject #81	109	104.909			LH_Default_Par_3	0	Subject #81	109	112.101		LH_Default_Par_3	0	Subject #81	109	107.223
	LH_Default_Par_4	0	Subject #82	118	111.933		LH_Default_Par_4	0	Subject #82	118	116.378			LH_Default_Par_4	0	Subject #82	118	111.819		LH_Default_Par_4	0	Subject #82	118	115.268
	LH_Default_PFC_1	0	Subject #83	134	117.107		LH_Default_PFC_1	0	Subject #83	134	117.567			LH_Default_PFC_1	0	Subject #83	134	117.313		LH_Default_PFC_1	0	Subject #83	134	117.764
	LH_Default_PFC_2	0	Subject #84	118	119.966		LH_Default_PFC_2	0	Subject #84	118	123.358			LH_Default_PFC_2	0	Subject #84	118	120.211		LH_Default_PFC_2	0	Subject #84	118	121.082
	LH_Default_PFC_3	0	Subject #85	111	117.157		LH_Default_PFC_3	0	Subject #85	111	117.612			LH_Default_PFC_3	0	Subject #85	111	116.645		LH_Default_PFC_3	0	Subject #85	111	116.794
	LH_Default_PFC_4	0	Subject #86	109	111.852		LH_Default_PFC_4	0	Subject #86	109	109.599			LH_Default_PFC_4	0	Subject #86	109	111.133		LH_Default_PFC_4	0	Subject #86	109	109.704
	LH_Default_PFC_5	0	Subject #87	119	110.218		LH_Default_PFC_5	0	Subject #87	119	108.198			LH_Default_PFC_5	0	Subject #87	119	110.778		LH_Default_PFC_5	0	Subject #87	119	110.599
	LH_Default_PFC_6	0.449	Subject #88	118	111.687		LH_Default_PFC_6	0.503	Subject #88	118	114.071			LH_Default_PFC_6	0.367	Subject #88	118	111.955		LH_Default_PFC_6	0.365	Subject #88	118	114.605
	LH_Default_PFC_7	0.34	Subject #89	120	117.539		LH_Default_PFC_7	0.56	Subject #89	120	126.444			LH_Default_PFC_7	0.265	Subject #89	120	116.862		LH_Default_PFC_7	0.177	Subject #89	120	124.402
	LH_Default_PFC_8	0	Subject #90	132	115.338		LH_Default_PFC_8	0	Subject #90	132	117.141			LH_Default_PFC_8	0	Subject #90	132	115.957		LH_Default_PFC_8	0	Subject #90	132	117.147
	LH_Default_PFC_9	0.083	Subject #91	111	114.795		LH_Default_PFC_9	0.207	Subject #91	111	114.24			LH_Default_PFC_9	0.074	Subject #91	111	114.979		LH_Default_PFC_9	0.218	Subject #91	111	114.452
	LH_Default_PFC_10	0.238	Subject #92	118	116.853		LH_Default_PFC_10	0.32	Subject #92	118	118.213			LH_Default_PFC_10	0.171	Subject #92	118	117.217		LH_Default_PFC_10	0.581	Subject #92	118	118.091
	LH_Default_PFC_11	0	Subject #93	120	119.946		LH_Default_PFC_11	0	Subject #93	120	117.843			LH_Default_PFC_11	0	Subject #93	120	119.25		LH_Default_PFC_11	0	Subject #93	120	117.736
	LH_Default_PFC_12	0	Subject #94	131	115.791		LH_Default_PFC_12	0	Subject #94	131	115.019			LH_Default_PFC_12	0	Subject #94	131	114.897		LH_Default_PFC_12	0	Subject #94	131	114.523
	LH_Default_PFC_13	0.503	Subject #95	123	118.959		LH_Default_PFC_13	0.564	Subject #95	123	117.752			LH_Default_PFC_13	0.426	Subject #95	123	119.22		LH_Default_PFC_13	0.654	Subject #95	123	117.962
	LH_Default_pCunPCC_1	0	Subject #96	126	111.695		LH_Default_pCunPCC_1	0	Subject #96	126	113.663			LH_Default_pCunPCC_1	0	Subject #96	126	111.072		LH_Default_pCunPCC_1	0	Subject #96	126	113.279
	LH_Default_pCunPCC_2	0	Subject #97	132	107.116		LH_Default_pCunPCC_2	0	Subject #97	132	111.017			LH_Default_pCunPCC_2	0	Subject #97	132	106.354		LH_Default_pCunPCC_2	0	Subject #97	132	110.381
	LH_Default_pCunPCC_3	0	Subject #98	119	109.681		LH_Default_pCunPCC_3	0	Subject #98	119	102.525			LH_Default_pCunPCC_3	0	Subject #98	119	109.646		LH_Default_pCunPCC_3	0	Subject #98	119	102.515
	LH_Default_pCunPCC_4	0	Subject #99	116	114.345		LH_Default_pCunPCC_4	0	Subject #99	116	118.1			LH_Default_pCunPCC_4	0	Subject #99	116	114.554		LH_Default_pCunPCC_4	0	Subject #99	116	118.909
	LH_Default_PHC_1	0.198	Subject #100	129	114.121		LH_Default_PHC_1	0.682	Subject #100	129	111.656			LH_Default_PHC_1	0.144	Subject #100	129	114.026		LH_Default_PHC_1	0.275	Subject #100	129	111.643
	RH_Vis_1	0	Subject #101	111	109.641		RH_Vis_1	0	Subject #101	111	108.565			RH_Vis_1	0	Subject #101	111	110.006		RH_Vis_1	0	Subject #101	111	109.274
	RH_Vis_2	0	Subject #102	109	105.688		RH_Vis_2	0	Subject #102	109	106.28			RH_Vis_2	0	Subject #102	109	105.075		RH_Vis_2	0	Subject #102	109	106.554
	RH_Vis_3	0	Subject #103	111	114.516		RH_Vis_3	0	Subject #103	111	112.982			RH_Vis_3	0	Subject #103	111	113.238		RH_Vis_3	0	Subject #103	111	112.586
	RH_Vis_4	0	Subject #104	103	110.171		RH_Vis_4	0	Subject #104	103	111.098			RH_Vis_4	0	Subject #104	103	110.769		RH_Vis_4	0	Subject #104	103	112.26
	RH_Vis_5	0	Subject #105	98	109.192		RH_Vis_5	0	Subject #105	98	107.602			RH_Vis_5	0	Subject #105	98	109.073		RH_Vis_5	0	Subject #105	98	106.869
	RH_Vis_6	0	Subject #106	117	111.532		RH_Vis_6	0	Subject #106	117	113.229			RH_Vis_6	0	Subject #106	117	111.959		RH_Vis_6	0	Subject #106	117	112.49
	RH_Vis_7	0	Subject #107	106	107.118		RH_Vis_7	0	Subject #107	106	104.37			RH_Vis_7	0	Subject #107	106	107.431		RH_Vis_7	0	Subject #107	106	105.041
	RH_Vis_8	0	Subject #108	106	107.944		RH_Vis_8	0	Subject #108	106	106.295			RH_Vis_8	0	Subject #108	106	107.815		RH_Vis_8	0	Subject #108	106	107.156
	RH_Vis_9	0	Subject #109	104	106.464		RH_Vis_9	0	Subject #109	104	103.582			RH_Vis_9	0	Subject #109	104	106.261		RH_Vis_9	0	Subject #109	104	105.252
	RH_Vis_10	0	Subject #110	118	111.412		RH_Vis_10	0	Subject #110	118	110.285			RH_Vis_10	0	Subject #110	118	110.861		RH_Vis_10	0	Subject #110	118	109.921
	RH_Vis_11	0	Subject #111	110	108.97		RH_Vis_11	0	Subject #111	110	108.105			RH_Vis_11	0	Subject #111	110	108.567		RH_Vis_11	0	Subject #111	110	107.776
	RH_Vis_12	0	Subject #112	107	107.369		RH_Vis_12	0	Subject #112	107	108.097			RH_Vis_12	0	Subject #112	107	107.293		RH_Vis_12	0	Subject #112	107	109.603
	RH_Vis_13	0	Subject #113	90	104.172		RH_Vis_13	0	Subject #113	90	103.114			RH_Vis_13	0	Subject #113	90	104.946		RH_Vis_13	0	Subject #113	90	104.259
	RH_Vis_14	0	Subject #114	115	116.146		RH_Vis_14	0	Subject #114	115	118.705			RH_Vis_14	0	Subject #114	115	114.367		RH_Vis_14	0	Subject #114	115	115.634
	RH_Vis_15	0	Subject #115	94	111.116		RH_Vis_15	0	Subject #115	94	105.673			RH_Vis_15	0	Subject #115	94	110.908		RH_Vis_15	0	Subject #115	94	107.594
	RH_SomMot_1	0	Subject #116	119	112.952		RH_SomMot_1	0	Subject #116	119	110.063			RH_SomMot_1	0	Subject #116	119	112.826		RH_SomMot_1	0	Subject #116	119	110.103
	RH_SomMot_2	0.24	Subject #117	127	112.475		RH_SomMot_2	0.74	Subject #117	127	117.44			RH_SomMot_2	0.199	Subject #117	127	112.049		RH_SomMot_2	0.331	Subject #117	127	116.487
	RH_SomMot_3	0	Subject #118	100	108.686		RH_SomMot_3	0	Subject #118	100	107.979			RH_SomMot_3	0	Subject #118	100	108.968		RH_SomMot_3	0	Subject #118	100	109.189
	RH_SomMot_4	0	Subject #119	103	113.719		RH_SomMot_4	0	Subject #119	103	112.105			RH_SomMot_4	0	Subject #119	103	112.645		RH_SomMot_4	0	Subject #119	103	111.552
	RH_SomMot_5	0	Subject #120	123	111.071		RH_SomMot_5	0	Subject #120	123	112.124			RH_SomMot_5	0	Subject #120	123	110.109		RH_SomMot_5	0	Subject #120	123	111.863
	RH_SomMot_6	0	Subject #121	126	111.526		RH_SomMot_6	0	Subject #121	126	113.952			RH_SomMot_6	0	Subject #121	126	111.442		RH_SomMot_6	0	Subject #121	126	113.608
	RH_SomMot_7	0	Subject #122	115	112.533		RH_SomMot_7	0	Subject #122	115	114.12			RH_SomMot_7	0	Subject #122	115	113.103		RH_SomMot_7	0	Subject #122	115	114.112
	RH_SomMot_8	0	Subject #123	116	107.122		RH_SomMot_8	0	Subject #123	116	104.577			RH_SomMot_8	0	Subject #123	116	107.626		RH_SomMot_8	0	Subject #123	116	105.059
	RH_SomMot_9	0	Subject #124	91	111.823		RH_SomMot_9	0	Subject #124	91	113.206			RH_SomMot_9	0	Subject #124	91	112.35		RH_SomMot_9	0	Subject #124	91	112.953
	RH_SomMot_10	0	Subject #125	129	118.849		RH_SomMot_10	0	Subject #125	129	118.746			RH_SomMot_10	0	Subject #125	129	118.6		RH_SomMot_10	0	Subject #125	129	118.266
	RH_SomMot_11	0	Subject #126	109	116.882		RH_SomMot_11	0	Subject #126	109	115.019			RH_SomMot_11	0	Subject #126	109	116.832		RH_SomMot_11	0	Subject #126	109	115.022
	RH_SomMot_12	0	Subject #127	110	112.402		RH_SomMot_12	0	Subject #127	110	115.615			RH_SomMot_12	0	Subject #127	110	112.868		RH_SomMot_12	0	Subject #127	110	116.19
	RH_SomMot_13	0	Subject #128	106	114.129		RH_SomMot_13	0	Subject #128	106	114.694			RH_SomMot_13	0	Subject #128	106	114.405		RH_SomMot_13	0	Subject #128	106	115.151
	RH_SomMot_14	0	Subject #129	110	116.368		RH_SomMot_14	0	Subject #129	110	115.465			RH_SomMot_14	0	Subject #129	110	116.338		RH_SomMot_14	0	Subject #129	110	116.151
	RH_SomMot_15	0	Subject #130	118	113.427		RH_SomMot_15	0	Subject #130	118	113.894			RH_SomMot_15	0	Subject #130	118	113.08		RH_SomMot_15	0	Subject #130	118	112.758
	RH_SomMot_16	0	Subject #131	104	120.179		RH_SomMot_16	0	Subject #131	104	119.433			RH_SomMot_16	0	Subject #131	104	120.221		RH_SomMot_16	0	Subject #131	104	118.882
	RH_SomMot_17	0	Subject #132	116	117.02		RH_SomMot_17	0	Subject #132	116	111.64			RH_SomMot_17	0	Subject #132	116	116.997		RH_SomMot_17	0	Subject #132	116	111
	RH_SomMot_18	0	Subject #133	125	105.859		RH_SomMot_18	0	Subject #133	125	102.853			RH_SomMot_18	0	Subject #133	125	105.729		RH_SomMot_18	0	Subject #133	125	103.732
	RH_SomMot_19	0	Subject #134	102	110.874		RH_SomMot_19	0	Subject #134	102	110.292			RH_SomMot_19	0	Subject #134	102	111.356		RH_SomMot_19	0	Subject #134	102	111.275
	RH_DorsAttn_Post_1	0	Subject #135	119	109.794		RH_DorsAttn_Post_1	0	Subject #135	119	108.209			RH_DorsAttn_Post_1	0	Subject #135	119	109.695		RH_DorsAttn_Post_1	0	Subject #135	119	107.551
	RH_DorsAttn_Post_2	0	Subject #136	117	107.103		RH_DorsAttn_Post_2	0	Subject #136	117	105.123			RH_DorsAttn_Post_2	0	Subject #136	117	107.243		RH_DorsAttn_Post_2	0	Subject #136	117	105.579
	RH_DorsAttn_Post_3	0	Subject #137	102	109.171		RH_DorsAttn_Post_3	0	Subject #137	102	109.005			RH_DorsAttn_Post_3	0	Subject #137	102	109.462		RH_DorsAttn_Post_3	0	Subject #137	102	109.505
	RH_DorsAttn_Post_4	0	Subject #138	109	108.232		RH_DorsAttn_Post_4	0	Subject #138	109	113.425			RH_DorsAttn_Post_4	0	Subject #138	109	107.938		RH_DorsAttn_Post_4	0	Subject #138	109	111.749
	RH_DorsAttn_Post_5	0	Subject #139	118	112.734		RH_DorsAttn_Post_5	0	Subject #139	118	109.95			RH_DorsAttn_Post_5	0	Subject #139	118	112.92		RH_DorsAttn_Post_5	0	Subject #139	118	110.159
	RH_DorsAttn_Post_6	0	Subject #140	103	111.593		RH_DorsAttn_Post_6	0	Subject #140	103	114.444			RH_DorsAttn_Post_6	0	Subject #140	103	111.524		RH_DorsAttn_Post_6	0	Subject #140	103	112.965
	RH_DorsAttn_Post_7	0.515	Subject #141	107	110.161		RH_DorsAttn_Post_7	0.547	Subject #141	107	113.92			RH_DorsAttn_Post_7	0.449	Subject #141	107	110.55		RH_DorsAttn_Post_7	0.414	Subject #141	107	114.184
	RH_DorsAttn_Post_8	0	Subject #142	125	106.371		RH_DorsAttn_Post_8	0	Subject #142	125	109.035			RH_DorsAttn_Post_8	0	Subject #142	125	106.189		RH_DorsAttn_Post_8	0	Subject #142	125	108.532
	RH_DorsAttn_Post_9	0	Subject #143	109	109.332		RH_DorsAttn_Post_9	0	Subject #143	109	106.68			RH_DorsAttn_Post_9	0	Subject #143	109	108.659		RH_DorsAttn_Post_9	0	Subject #143	109	106.902
	RH_DorsAttn_Post_10	0	Subject #144	115	112.454		RH_DorsAttn_Post_10	0	Subject #144	115	112.399			RH_DorsAttn_Post_10	0	Subject #144	115	111.985		RH_DorsAttn_Post_10	0	Subject #144	115	112.829
	RH_DorsAttn_FEF_1	0	Subject #145	129	110.74		RH_DorsAttn_FEF_1	0	Subject #145	129	114.53			RH_DorsAttn_FEF_1	0	Subject #145	129	110.364		RH_DorsAttn_FEF_1	0	Subject #145	129	113.808
	RH_DorsAttn_FEF_2	0	Subject #146	105	113.636		RH_DorsAttn_FEF_2	0	Subject #146	105	104.561			RH_DorsAttn_FEF_2	0	Subject #146	105	113.112		RH_DorsAttn_FEF_2	0	Subject #146	105	104.906
	RH_DorsAttn_PrCv_1	0	Subject #147	126	106.849		RH_DorsAttn_PrCv_1	0	Subject #147	126	106.55			RH_DorsAttn_PrCv_1	0	Subject #147	126	106.37		RH_DorsAttn_PrCv_1	0	Subject #147	126	105.051
	RH_SalVentAttn_TempOccPar_1	0	Subject #148	121	112.857		RH_SalVentAttn_TempOccPar_1	0	Subject #148	121	113.949			RH_SalVentAttn_TempOccPar_1	0	Subject #148	121	113.109		RH_SalVentAttn_TempOccPar_1	0	Subject #148	121	112.411
	RH_SalVentAttn_TempOccPar_2	0	Subject #149	105	108.782		RH_SalVentAttn_TempOccPar_2	0	Subject #149	105	107.774			RH_SalVentAttn_TempOccPar_2	0	Subject #149	105	109.25		RH_SalVentAttn_TempOccPar_2	0	Subject #149	105	108.137
	RH_SalVentAttn_TempOccPar_3	0	Subject #150	115	111.24		RH_SalVentAttn_TempOccPar_3	0	Subject #150	115	115.945			RH_SalVentAttn_TempOccPar_3	0	Subject #150	115	111.373		RH_SalVentAttn_TempOccPar_3	0	Subject #150	115	114.7
	RH_SalVentAttn_PrC_1	0	Subject #151	134	109.465		RH_SalVentAttn_PrC_1	0	Subject #151	134	107.512			RH_SalVentAttn_PrC_1	0	Subject #151	134	109.657		RH_SalVentAttn_PrC_1	0	Subject #151	134	107.428
	RH_SalVentAttn_FrOperIns_1	0	Subject #152	96	114.439		RH_SalVentAttn_FrOperIns_1	0	Subject #152	96	112.592			RH_SalVentAttn_FrOperIns_1	0	Subject #152	96	114.951		RH_SalVentAttn_FrOperIns_1	0	Subject #152	96	113.005
	RH_SalVentAttn_FrOperIns_2	0	Subject #153	94	107.798		RH_SalVentAttn_FrOperIns_2	0	Subject #153	94	109.433			RH_SalVentAttn_FrOperIns_2	0	Subject #153	94	107.811		RH_SalVentAttn_FrOperIns_2	0	Subject #153	94	110.181
	RH_SalVentAttn_FrOperIns_3	0	Subject #154	105	108.094		RH_SalVentAttn_FrOperIns_3	0	Subject #154	105	106.23			RH_SalVentAttn_FrOperIns_3	0	Subject #154	105	107.527		RH_SalVentAttn_FrOperIns_3	0	Subject #154	105	106.124
	RH_SalVentAttn_FrOperIns_4	0	Subject #155	91	108.572		RH_SalVentAttn_FrOperIns_4	0	Subject #155	91	107.547			RH_SalVentAttn_FrOperIns_4	0	Subject #155	91	108.835		RH_SalVentAttn_FrOperIns_4	0	Subject #155	91	107.515
	RH_SalVentAttn_Med_1	0	Subject #156	102	112.234		RH_SalVentAttn_Med_1	0	Subject #156	102	113.209			RH_SalVentAttn_Med_1	0	Subject #156	102	111.634		RH_SalVentAttn_Med_1	0	Subject #156	102	113.574
	RH_SalVentAttn_Med_2	0	Subject #157	109	115.789		RH_SalVentAttn_Med_2	0	Subject #157	109	118.539			RH_SalVentAttn_Med_2	0	Subject #157	109	116.333		RH_SalVentAttn_Med_2	0	Subject #157	109	118.417
	RH_SalVentAttn_Med_3	0	Subject #158	121	115.901		RH_SalVentAttn_Med_3	0	Subject #158	121	114.938			RH_SalVentAttn_Med_3	0	Subject #158	121	115.742		RH_SalVentAttn_Med_3	0	Subject #158	121	116.153
	RH_Limbic_OFC_1	0.583	Subject #159	106	113.2		RH_Limbic_OFC_1	0.581	Subject #159	106	114.496			RH_Limbic_OFC_1	0.473	Subject #159	106	112.919		RH_Limbic_OFC_1	0.428	Subject #159	106	113.644
	RH_Limbic_OFC_2	0	Subject #160	97	105.546		RH_Limbic_OFC_2	0	Subject #160	97	105.221			RH_Limbic_OFC_2	0	Subject #160	97	105.925		RH_Limbic_OFC_2	0	Subject #160	97	105.736
	RH_Limbic_OFC_3	0.051	Subject #161	112	116.199		RH_Limbic_OFC_3	0.059	Subject #161	112	117.776			RH_Limbic_OFC_3	0.036	Subject #161	112	116.017		RH_Limbic_OFC_3	0.308	Subject #161	112	116.63
	RH_Limbic_TempPole_1	0	Subject #162	127	113.692		RH_Limbic_TempPole_1	0	Subject #162	127	112.203			RH_Limbic_TempPole_1	0	Subject #162	127	113.994		RH_Limbic_TempPole_1	0	Subject #162	127	112.847
	RH_Limbic_TempPole_2	0	Subject #163	127	114.326		RH_Limbic_TempPole_2	0	Subject #163	127	117.824			RH_Limbic_TempPole_2	0	Subject #163	127	113.597		RH_Limbic_TempPole_2	0	Subject #163	127	116.273
	RH_Limbic_TempPole_3	0	Subject #164	99	116.343		RH_Limbic_TempPole_3	0	Subject #164	99	113.123			RH_Limbic_TempPole_3	0	Subject #164	99	117.031		RH_Limbic_TempPole_3	0	Subject #164	99	114.049
	RH_Cont_Par_1	0	Subject #165	106	107.975		RH_Cont_Par_1	0	Subject #165	106	109.044			RH_Cont_Par_1	0	Subject #165	106	109.613		RH_Cont_Par_1	0	Subject #165	106	109.718
	RH_Cont_Par_2	0	Subject #166	127	114.634		RH_Cont_Par_2	0	Subject #166	127	115.066			RH_Cont_Par_2	0	Subject #166	127	114.369		RH_Cont_Par_2	0	Subject #166	127	115.779
	RH_Cont_Par_3	0.163	Subject #167	76	115.512		RH_Cont_Par_3	0.131	Subject #167	76	116.962			RH_Cont_Par_3	0.129	Subject #167	76	116.419		RH_Cont_Par_3	0.197	Subject #167	76	116.016
	RH_Cont_Temp_1	0	Subject #168	101	108.416		RH_Cont_Temp_1	0	Subject #168	101	109.4			RH_Cont_Temp_1	0	Subject #168	101	108.579		RH_Cont_Temp_1	0	Subject #168	101	110.094
	RH_Cont_PFCv_1	0	Subject #169	118	113.635		RH_Cont_PFCv_1	0	Subject #169	118	112.847			RH_Cont_PFCv_1	0	Subject #169	118	113.103		RH_Cont_PFCv_1	0	Subject #169	118	111.117
	RH_Cont_PFCl_1	0.177					RH_Cont_PFCl_1	0.417						RH_Cont_PFCl_1	0.108					RH_Cont_PFCl_1	0.257
	RH_Cont_PFCl_2	0.068					RH_Cont_PFCl_2	0.271						RH_Cont_PFCl_2	0.045					RH_Cont_PFCl_2	0.062
	RH_Cont_PFCl_3	0					RH_Cont_PFCl_3	0						RH_Cont_PFCl_3	0					RH_Cont_PFCl_3	0
	RH_Cont_PFCl_4	0					RH_Cont_PFCl_4	0						RH_Cont_PFCl_4	0					RH_Cont_PFCl_4	0
	RH_Cont_PFCl_5	0					RH_Cont_PFCl_5	0						RH_Cont_PFCl_5	0					RH_Cont_PFCl_5	0
	RH_Cont_PFCl_6	0					RH_Cont_PFCl_6	0						RH_Cont_PFCl_6	0					RH_Cont_PFCl_6	0
	RH_Cont_PFCl_7	0					RH_Cont_PFCl_7	0						RH_Cont_PFCl_7	0					RH_Cont_PFCl_7	0
	RH_Cont_pCun_1	0					RH_Cont_pCun_1	0						RH_Cont_pCun_1	0					RH_Cont_pCun_1	0
	RH_Cont_Cing_1	0					RH_Cont_Cing_1	0						RH_Cont_Cing_1	0					RH_Cont_Cing_1	0
	RH_Cont_Cing_2	0					RH_Cont_Cing_2	0						RH_Cont_Cing_2	0					RH_Cont_Cing_2	0
	RH_Cont_PFCmp_1	0					RH_Cont_PFCmp_1	0						RH_Cont_PFCmp_1	0					RH_Cont_PFCmp_1	0
	RH_Cont_PFCmp_2	0					RH_Cont_PFCmp_2	0						RH_Cont_PFCmp_2	0					RH_Cont_PFCmp_2	0
	RH_Default_Par_1	0					RH_Default_Par_1	0						RH_Default_Par_1	0					RH_Default_Par_1	0
	RH_Default_Par_2	0					RH_Default_Par_2	0						RH_Default_Par_2	0					RH_Default_Par_2	0
	RH_Default_Par_3	0					RH_Default_Par_3	0						RH_Default_Par_3	0					RH_Default_Par_3	0
	RH_Default_Temp_1	0					RH_Default_Temp_1	0						RH_Default_Temp_1	0					RH_Default_Temp_1	0
	RH_Default_Temp_2	0					RH_Default_Temp_2	0						RH_Default_Temp_2	0					RH_Default_Temp_2	0
	RH_Default_Temp_3	0					RH_Default_Temp_3	0						RH_Default_Temp_3	0					RH_Default_Temp_3	0
	RH_Default_Temp_4	0					RH_Default_Temp_4	0						RH_Default_Temp_4	0					RH_Default_Temp_4	0
	RH_Default_Temp_5	0					RH_Default_Temp_5	0						RH_Default_Temp_5	0					RH_Default_Temp_5	0
	RH_Default_PFCv_1	0					RH_Default_PFCv_1	0						RH_Default_PFCv_1	0					RH_Default_PFCv_1	0
	RH_Default_PFCdPFCm_1	0.184					RH_Default_PFCdPFCm_1	0.429						RH_Default_PFCdPFCm_1	0.153					RH_Default_PFCdPFCm_1	0.224
	RH_Default_PFCdPFCm_2	0.282					RH_Default_PFCdPFCm_2	0.271						RH_Default_PFCdPFCm_2	0.222					RH_Default_PFCdPFCm_2	0.256
	RH_Default_PFCdPFCm_3	0					RH_Default_PFCdPFCm_3	0						RH_Default_PFCdPFCm_3	0					RH_Default_PFCdPFCm_3	0
	RH_Default_PFCdPFCm_4	0.412					RH_Default_PFCdPFCm_4	0.481						RH_Default_PFCdPFCm_4	0.332					RH_Default_PFCdPFCm_4	0.396
	RH_Default_PFCdPFCm_5	0					RH_Default_PFCdPFCm_5	0						RH_Default_PFCdPFCm_5	0					RH_Default_PFCdPFCm_5	0
	RH_Default_PFCdPFCm_6	0					RH_Default_PFCdPFCm_6	0						RH_Default_PFCdPFCm_6	0					RH_Default_PFCdPFCm_6	0
	RH_Default_PFCdPFCm_7	0					RH_Default_PFCdPFCm_7	0						RH_Default_PFCdPFCm_7	0					RH_Default_PFCdPFCm_7	0
	RH_Default_pCunPCC_1	0					RH_Default_pCunPCC_1	0						RH_Default_pCunPCC_1	0					RH_Default_pCunPCC_1	0
	RH_Default_pCunPCC_2	0					RH_Default_pCunPCC_2	0						RH_Default_pCunPCC_2	0					RH_Default_pCunPCC_2	0
	RH_Default_pCunPCC_3	0					RH_Default_pCunPCC_3	0						RH_Default_pCunPCC_3	0					RH_Default_pCunPCC_3	0
