# Supplementary material for: An expanding manifold in transmodal regions characterizes adolescent reconfiguration of structural connectome organization
Source: eLife. 2021 Mar 31;10:e64694. doi: 10.7554/eLife.64694 (PMC8087442; doi:10.7554/eLife.64694)
Supplement: Supplementary file 1. — Gene symbols with name and t-statistic as well as false discovery rate-corrected p-value are reported in the Supplementary File (Supplementary_File1.xlsx). [file elife-64694-supp1.xlsx]

## Sheet: Sheet1
Gene symbol	Name	t	FDR
CHST9	carbohydrate (N-acetylgalactosamine 4-0) sulfotransferase 9	-24.76	0.005837
SHD	Src homology 2 domain containing transforming protein D	24.2	0.005837
SPTSSB	serine palmitoyltransferase, small subunit B	20.9	0.008777
CPNE9	copine family member IX	20.12	0.00952
COL5A1	collagen, type V, alpha 1	18.34	0.009686
POLR2L	polymerase (RNA) II (DNA directed) polypeptide L, 7.6kDa	-18.46	0.009686
RSPO4	R-spondin 4	-18.57	0.009686
COX7A1	cytochrome c oxidase subunit VIIa polypeptide 1 (muscle)	17.57	0.009969
FAM20A	family with sequence similarity 20, member A	17.77	0.009969
ITPR1	inositol 1,4,5-trisphosphate receptor, type 1	17.39	0.009969
HAPLN4	hyaluronan and proteoglycan link protein 4	16.59	0.011633
GLUD1	glutamate dehydrogenase 1	-16.27	0.01177
KCNN3	potassium intermediate/small conductance calcium-activated channel, subfamily N, member 3	-15.51	0.01177
PPL	periplakin	15.24	0.01177
RELL2	RELT-like 2	16.34	0.01177
RGS7	regulator of G-protein signaling 7	15.24	0.01177
SMARCD3	SWI/SNF related, matrix associated, actin dependent regulator of chromatin, subfamily d, member 3	-15.52	0.01177
PRSS16	protease, serine, 16 (thymus)	14.22	0.013155
SCN1A	sodium channel, voltage-gated, type I, alpha subunit	14.23	0.013155
STX19	syntaxin 19	14.5	0.013155
NGB	neuroglobin	13.77	0.013718
DDAH2	dimethylarginine dimethylaminohydrolase 2	-13.61	0.014057
GPD2	glycerol-3-phosphate dehydrogenase 2 (mitochondrial)	-13.57	0.014057
EPN3	epsin 3	13.29	0.01456
LRRC38	leucine rich repeat containing 38	13.22	0.014591
FBLN7	fibulin 7	13.06	0.015037
MACROD2	MACRO domain containing 2	-13.01	0.015088
NKAIN4	Na+/K+ transporting ATPase interacting 4	-12.7	0.015989
CPLX1	complexin 1	12.48	0.016417
EXTL2	exostoses (multiple)-like 2	12.53	0.016417
FLRT3	fibronectin leucine rich transmembrane protein 3	12.48	0.016417
LYPD1	LY6/PLAUR domain containing 1	-12.38	0.016417
GLCCI1	glucocorticoid induced transcript 1	12.24	0.016498
LAG3	lymphocyte-activation gene 3	12.06	0.016758
DNAH14	dynein, axonemal, heavy chain 14	-11.32	0.016963
KCNAB3	potassium voltage-gated channel, shaker-related subfamily, beta member 3	11.95	0.016963
PREP	prolyl endopeptidase	11.82	0.016963
SCN1B	sodium channel, voltage-gated, type I, beta subunit	11.67	0.016963
SCRT1	scratch homolog 1, zinc finger protein (Drosophila)	11.53	0.016963
SHROOM3	shroom family member 3	11.4	0.016963
SPAG4	sperm associated antigen 4	11.3	0.016963
TDRD1	tudor domain containing 1	11.74	0.016963
TNNC2	troponin C type 2 (fast)	11.88	0.016963
TPK1	thiamin pyrophosphokinase 1	11.39	0.016963
FGF18	fibroblast growth factor 18	11.18	0.017216
KLHL13	kelch-like 13 (Drosophila)	-11.16	0.017216
ASB13	ankyrin repeat and SOCS box containing 13	10.81	0.017338
LINC00473	long intergenic non-protein coding RNA 473	10.85	0.017338
MYO15A	myosin XVA	11.01	0.017338
S100A10	S100 calcium binding protein A10	-10.92	0.017338
SIX4	SIX homeobox 4	10.79	0.017338
STAMBPL1	STAM binding protein-like 1	10.87	0.017338
STXBP5L	syntaxin binding protein 5-like	10.97	0.017338
SLIT3	slit homolog 3 (Drosophila)	-10.73	0.017669
GABRA1	gamma-aminobutyric acid (GABA) A receptor, alpha 1	10.66	0.01786
FES	feline sarcoma oncogene	10.65	0.017881
MIR31HG	MIR31 host gene (non-protein coding)	10.57	0.018098
OSBPL6	oxysterol binding protein-like 6	10.59	0.018098
GABRD	gamma-aminobutyric acid (GABA) A receptor, delta	10.53	0.018151
SCAPER	S-phase cyclin A-associated protein in the ER	-10.46	0.018495
GNG4	guanine nucleotide binding protein (G protein), gamma 4	-10.38	0.01854
IL17RD	interleukin 17 receptor D	-10.37	0.01854
SRPK1	SRSF protein kinase 1	10.38	0.01854
EIF4E1B	eukaryotic translation initiation factor 4E family member 1B	10.3	0.01869
MAP3K13	mitogen-activated protein kinase kinase kinase 13	10.3	0.01869
NTSR2	neurotensin receptor 2	-10.28	0.018702
CFD	complement factor D (adipsin)	-10.24	0.018773
UCHL3	ubiquitin carboxyl-terminal esterase L3 (ubiquitin thiolesterase)	-10.2	0.018879
KCNA2	potassium voltage-gated channel, shaker-related subfamily, member 2	10.13	0.019111
PVALB	parvalbumin	10.01	0.019518
UCHL5	ubiquitin carboxyl-terminal hydrolase L5	10.02	0.019518
HIVEP2	human immunodeficiency virus type I enhancer binding protein 2	9.9	0.019959
CADPS2	Ca++-dependent secretion activator 2	9.8	0.020226
CITED2	Cbp/p300-interacting transactivator, with Glu/Asp-rich carboxy-terminal domain, 2	9.78	0.020226
GLS2	glutaminase 2 (liver, mitochondrial)	9.82	0.020226
STRBP	spermatid perinuclear RNA binding protein	9.81	0.020226
PTPRA	protein tyrosine phosphatase, receptor type, A	-9.75	0.020238
CCNI	cyclin I	9.39	0.02101
DERL1	derlin 1	-9.38	0.02101
EIF5A2	eukaryotic translation initiation factor 5A2	9.55	0.02101
KBTBD6	kelch repeat and BTB (POZ) domain containing 6	-9.46	0.02101
PDLIM5	PDZ and LIM domain 5	-9.41	0.02101
SLC39A14	solute carrier family 39 (zinc transporter), member 14	9.45	0.02101
SYCP2	synaptonemal complex protein 2	9.49	0.02101
TPTE2P6	transmembrane phosphoinositide 3-phosphatase and tensin homolog 2 pseudogene 6	9.57	0.02101
ZNF385B	zinc finger protein 385B	9.49	0.02101
MAFB	v-maf musculoaponeurotic fibrosarcoma oncogene homolog B (avian)	9.37	0.021029
ZBTB16	zinc finger and BTB domain containing 16	9.34	0.021029
KCNS1	potassium voltage-gated channel, delayed-rectifier, subfamily S, member 1	9.28	0.021394
PLXDC1	plexin domain containing 1	9.24	0.021642
RAD54B	RAD54 homolog B (S. cerevisiae)	9.23	0.021642
NAPEPLD	N-acyl phosphatidylethanolamine phospholipase D	9.18	0.021913
HTR2C	5-hydroxytryptamine (serotonin) receptor 2C, G protein-coupled	-9.12	0.021952
NEFH	neurofilament, heavy polypeptide	9.12	0.021952
BHMT2	betaine--homocysteine S-methyltransferase 2	-9.02	0.022175
ECM1	extracellular matrix protein 1	9.05	0.022175
PHYH	phytanoyl-CoA 2-hydroxylase	9.03	0.022175
CCDC8	coiled-coil domain containing 8	-8.88	0.022328
CTNNAL1	catenin (cadherin-associated protein), alpha-like 1	8.87	0.022328
EPCAM	epithelial cell adhesion molecule	-8.84	0.022409
ANKH	ankylosis, progressive homolog (mouse)	8.79	0.022459
LIX1	Lix1 homolog (chicken)	-8.8	0.022459
ROBO1	roundabout, axon guidance receptor, homolog 1 (Drosophila)	-8.82	0.022459
TMEM132E	transmembrane protein 132E	8.79	0.022459
ST3GAL6	ST3 beta-galactoside alpha-2,3-sialyltransferase 6	8.75	0.022524
FNDC4	fibronectin type III domain containing 4	8.71	0.022854
CAMK2G	calcium/calmodulin-dependent protein kinase II gamma	8.71	0.022859
NIPAL2	NIPA-like domain containing 2	8.69	0.022863
MR1	major histocompatibility complex, class I-related	-8.61	0.023143
COCH	coagulation factor C homolog, cochlin (Limulus polyphemus)	-8.54	0.023212
KIF2C	kinesin family member 2C	8.55	0.023212
PPARGC1A	peroxisome proliferator-activated receptor gamma, coactivator 1 alpha	8.55	0.023212
STEAP2	STEAP family member 2, metalloreductase	8.52	0.023356
TIMP3	TIMP metallopeptidase inhibitor 3	-8.46	0.023864
EFNA5	ephrin-A5	8.44	0.023882
RIMKLA	ribosomal modification protein rimK-like family member A	8.44	0.023882
CABP1	calcium binding protein 1	8.38	0.024314
SOHLH1	spermatogenesis and oogenesis specific basic helix-loop-helix 1	8.37	0.024406
RRP7A	ribosomal RNA processing 7 homolog A (S. cerevisiae)	-8.33	0.02471
NCK2	NCK adaptor protein 2	8.26	0.025077
DMKN	dermokine	8.21	0.025295
MUCL1	mucin-like 1	8.2	0.025295
P2RY1	purinergic receptor P2Y, G-protein coupled, 1	-8.2	0.025295
CHRNA2	cholinergic receptor, nicotinic, alpha 2 (neuronal)	8.07	0.026518
SIRT4	sirtuin 4	8.06	0.026518
DNAJC12	DnaJ (Hsp40) homolog, subfamily C, member 12	-7.96	0.026914
ICA1	islet cell autoantigen 1, 69kDa	7.98	0.026914
LYPLAL1	lysophospholipase-like 1	-8	0.026914
PON3	paraoxonase 3	-7.96	0.026914
HR	hairless homolog (mouse)	7.95	0.026921
RCAN2	regulator of calcineurin 2	7.91	0.027173
CASQ1	calsequestrin 1 (fast-twitch, skeletal muscle)	7.78	0.027364
CHGA	chromogranin A (parathyroid secretory protein 1)	7.85	0.027364
FSTL1	follistatin-like 1	7.74	0.027364
GABRB2	gamma-aminobutyric acid (GABA) A receptor, beta 2	7.75	0.027364
GLUD2	glutamate dehydrogenase 2	-7.83	0.027364
GNG10	guanine nucleotide binding protein (G protein), gamma 10	-7.8	0.027364
KCNE4	potassium voltage-gated channel, Isk-related family, member 4	-7.76	0.027364
PGRMC1	progesterone receptor membrane component 1	-7.79	0.027364
PTPN4	protein tyrosine phosphatase, non-receptor type 4 (megakaryocyte)	7.86	0.027364
SEMA7A	semaphorin 7A, GPI membrane anchor (John Milton Hagen blood group)	7.8	0.027364
PALLD	palladin, cytoskeletal associated protein	-7.73	0.027367
ESRRG	estrogen-related receptor gamma	7.7	0.02759
GTF2F2	general transcription factor IIF, polypeptide 2, 30kDa	-7.68	0.0278
N4BP2L1	NEDD4 binding protein 2-like 1	7.67	0.0278
ATP4A	ATPase, H+/K+ exchanging, alpha polypeptide	7.64	0.027914
ASB2	ankyrin repeat and SOCS box containing 2	7.63	0.027961
FGD4	FYVE, RhoGEF and PH domain containing 4	-7.62	0.027961
HCN1	hyperpolarization activated cyclic nucleotide-gated potassium channel 1	7.62	0.027961
KLF9	Kruppel-like factor 9	7.61	0.027961
SLC29A1	solute carrier family 29 (nucleoside transporters), member 1	7.63	0.027961
DKK1	dickkopf 1 homolog (Xenopus laevis)	7.58	0.02827
GLRX	glutaredoxin (thioltransferase)	7.55	0.028558
ANKRD34C	ankyrin repeat domain 34C	7.48	0.029013
C12orf45	chromosome 12 open reading frame 45	-7.44	0.029016
RRAGB	Ras-related GTP binding B	-7.42	0.029341
STS	steroid sulfatase (microsomal), isozyme S	7.41	0.029341
ADPRHL1	ADP-ribosylhydrolase like 1	7.35	0.029524
IMPACT	Impact homolog (mouse)	-7.36	0.029524
TMEM120A	transmembrane protein 120A	-7.35	0.029524
WDFY4	WDFY family member 4	-7.35	0.029524
ZNF385D	zinc finger protein 385D	7.35	0.029524
GNAS	GNAS complex locus	7.33	0.029712
FBXO9	F-box protein 9	7.31	0.029867
CPNE6	copine VI (neuronal)	-7.25	0.029966
DNAJA4	DnaJ (Hsp40) homolog, subfamily A, member 4	-7.21	0.029966
FBXO33	F-box protein 33	7.22	0.029966
IQCA1	IQ motif containing with AAA domain 1	-7.26	0.029966
LGI2	leucine-rich repeat LGI family, member 2	7.22	0.029966
LRRC36	leucine rich repeat containing 36	-7.2	0.029966
MADCAM1	mucosal vascular addressin cell adhesion molecule 1	7.24	0.029966
MGP	matrix Gla protein	7.28	0.029966
OR2L8	olfactory receptor, family 2, subfamily L, member 8	7.23	0.029966
PHLDA2	pleckstrin homology-like domain, family A, member 2	7.17	0.029966
RARB	retinoic acid receptor, beta	7.26	0.029966
RPP25	ribonuclease P/MRP 25kDa subunit	7.24	0.029966
STAC2	SH3 and cysteine rich domain 2	7.25	0.029966
TRIM37	tripartite motif containing 37	7.19	0.029966
WDR66	WD repeat domain 66	-7.26	0.029966
LOC642852	uncharacterized LOC642852	-7.15	0.030095
MAGI3	membrane associated guanylate kinase, WW and PDZ domain containing 3	7.15	0.030095
SULT1C4	sulfotransferase family, cytosolic, 1C, member 4	-7.08	0.030441
PGAP1	post-GPI attachment to proteins 1	-7.05	0.030625
PTGS1	prostaglandin-endoperoxide synthase 1 (prostaglandin G/H synthase and cyclooxygenase)	7.04	0.030628
CPE	carboxypeptidase E	-7	0.030981
TSPAN5	tetraspanin 5	6.99	0.030981
POU6F2	POU class 6 homeobox 2	6.96	0.031081
SCN8A	sodium channel, voltage gated, type VIII, alpha subunit	6.97	0.031081
SORL1	sortilin-related receptor, L(DLR class) A repeats containing	6.95	0.031325
ENTPD4	ectonucleoside triphosphate diphosphohydrolase 4	6.94	0.031423
MINK1	misshapen-like kinase 1	-6.92	0.031491
PARD3B	par-3 partitioning defective 3 homolog B (C. elegans)	-6.89	0.031676
RNF150	ring finger protein 150	-6.9	0.031676
TMEM176A	transmembrane protein 176A	-6.9	0.031676
ARL4C	ADP-ribosylation factor-like 4C	6.87	0.031734
KCNJ11	potassium inwardly-rectifying channel, subfamily J, member 11	6.86	0.031734
PREX2	phosphatidylinositol-3,4,5-trisphosphate-dependent Rac exchange factor 2	-6.86	0.031734
LGALS1	lectin, galactoside-binding, soluble, 1	6.85	0.031791
RHOC	ras homolog family member C	-6.84	0.031918
RYR3	ryanodine receptor 3	-6.81	0.0322
DQX1	DEAQ box RNA-dependent ATPase 1	6.79	0.032346
MYH7B	myosin, heavy chain 7B, cardiac muscle, beta	6.79	0.032346
IGFBP2	insulin-like growth factor binding protein 2, 36kDa	6.78	0.032429
SYT12	synaptotagmin XII	6.75	0.032541
TPBG	trophoblast glycoprotein	6.76	0.032541
LRRN1	leucine rich repeat neuronal 1	-6.73	0.032955
STK17A	serine/threonine kinase 17a	-6.72	0.032964
UBE2QL1	ubiquitin-conjugating enzyme E2Q family-like 1	6.71	0.032974
NT5M	5,3-nucleotidase, mitochondrial	6.69	0.033154
PCP4L1	Purkinje cell protein 4 like 1	6.65	0.033329
MKX	mohawk homeobox	6.65	0.033343
SLC16A2	solute carrier family 16, member 2 (thyroid hormone transporter)	-6.64	0.033343
MT1F	metallothionein 1F	-6.62	0.033578
PTPN3	protein tyrosine phosphatase, non-receptor type 3	6.59	0.03362
POSTN	periostin, osteoblast specific factor	6.56	0.033791
UG0898H09	uncharacterized LOC643763	-6.56	0.033821
ADCYAP1R1	adenylate cyclase activating polypeptide 1 (pituitary) receptor type I	-6.55	0.033973
ECHDC3	enoyl CoA hydratase domain containing 3	-6.54	0.034028
FABP5P3	fatty acid binding protein 5 pseudogene 3	-6.53	0.034155
SLC25A5	solute carrier family 25 (mitochondrial carrier; adenine nucleotide translocator), member 5	6.53	0.034155
CDS1	CDP-diacylglycerol synthase (phosphatidate cytidylyltransferase) 1	6.51	0.034269
APOC1	apolipoprotein C-I	-6.5	0.034283
BTN3A2	butyrophilin, subfamily 3, member A2	-6.5	0.034283
CTSO	cathepsin O	-6.5	0.034283
RET	ret proto-oncogene	6.48	0.034522
SMPX	small muscle protein, X-linked	6.47	0.034603
TUBGCP5	tubulin, gamma complex associated protein 5	6.47	0.034603
FGF9	fibroblast growth factor 9 (glia-activating factor)	6.45	0.034785
PRDM2	PR domain containing 2, with ZNF domain	6.44	0.034785
SERTAD4	SERTA domain containing 4	6.42	0.034785
TMEM136	transmembrane protein 136	-6.42	0.034785
LYPD5	LY6/PLAUR domain containing 5	6.39	0.035
ARL9	ADP-ribosylation factor-like 9	6.35	0.035307
CXorf57	chromosome X open reading frame 57	-6.35	0.035307
PTH2R	parathyroid hormone 2 receptor	6.35	0.035307
P2RX6P	purinergic receptor P2X, ligand-gated ion channel, 6 pseudogene	6.35	0.03531
PKIA	protein kinase (cAMP-dependent, catalytic) inhibitor alpha	-6.33	0.03531
SLC16A7	solute carrier family 16, member 7 (monocarboxylic acid transporter 2)	6.34	0.03531
TNNT2	troponin T type 2 (cardiac)	6.33	0.03531
KCTD10	potassium channel tetramerisation domain containing 10	-6.32	0.035383
CREM	cAMP responsive element modulator	-6.28	0.035543
EDNRB	endothelin receptor type B	-6.28	0.035543
IFFO1	intermediate filament family orphan 1	6.28	0.035543
IRS1	insulin receptor substrate 1	6.31	0.035543
NECAB3	N-terminal EF-hand calcium binding protein 3	6.26	0.035543
PEA15	phosphoprotein enriched in astrocytes 15	-6.27	0.035543
RSPO3	R-spondin 3	-6.29	0.035543
TFEC	transcription factor EC	-6.26	0.035608
EPHX1	epoxide hydrolase 1, microsomal (xenobiotic)	-6.24	0.035687
GSDMB	gasdermin B	6.24	0.035687
OSTF1	osteoclast stimulating factor 1	6.24	0.035687
HTR1E	5-hydroxytryptamine (serotonin) receptor 1E, G protein-coupled	6.22	0.035779
FZD1	frizzled family receptor 1	-6.2	0.036045
THEMIS	thymocyte selection associated	6.18	0.036286
ALDH1A3	aldehyde dehydrogenase 1 family, member A3	6.17	0.036399
SPHKAP	SPHK1 interactor, AKAP domain containing	-6.16	0.036515
RHOBTB2	Rho-related BTB domain containing 2	6.12	0.037171
RTKN2	rhotekin 2	6.11	0.037186
DLG5	discs, large homolog 5 (Drosophila)	6.1	0.037213
NIF3L1	NIF3 NGG1 interacting factor 3-like 1 (S. cerevisiae)	6.1	0.037323
E2F5	E2F transcription factor 5, p130-binding	-6.09	0.037336
KLHL8	kelch-like 8 (Drosophila)	6.08	0.037336
TTR	transthyretin	-6.09	0.037336
PELI3	pellino E3 ubiquitin protein ligase family member 3	6.06	0.037489
ST8SIA1	ST8 alpha-N-acetyl-neuraminide alpha-2,8-sialyltransferase 1	6.06	0.037489
PNMT	phenylethanolamine N-methyltransferase	-6.04	0.03757
ZMAT1	zinc finger, matrin-type 1	-6.03	0.037707
FNBP1L	formin binding protein 1-like	-5.99	0.038141
GPR161	G protein-coupled receptor 161	5.98	0.038192
SH3BGRL3	SH3 domain binding glutamic acid-rich protein like 3	-5.97	0.038192
CMYA5	cardiomyopathy associated 5	5.97	0.038245
FABP6	fatty acid binding protein 6, ileal	-5.96	0.038367
CCDC85A	coiled-coil domain containing 85A	5.95	0.038524
LUZP1	leucine zipper protein 1	5.94	0.03857
ANKRD50	ankyrin repeat domain 50	-5.91	0.039037
CADM1	cell adhesion molecule 1	-5.91	0.039081
MILR1	mast cell immunoglobulin-like receptor 1	-5.91	0.039113
DCN	decorin	-5.9	0.039208
DAPL1	death associated protein-like 1	-5.87	0.039606
RHBDL3	rhomboid, veinlet-like 3 (Drosophila)	5.86	0.039606
RAB3C	RAB3C, member RAS oncogene family	-5.86	0.039765
LRCH2	leucine-rich repeats and calponin homology (CH) domain containing 2	-5.85	0.039898
SKAP1	src kinase associated phosphoprotein 1	-5.83	0.040092
PLEKHM2	pleckstrin homology domain containing, family M (with RUN domain) member 2	5.82	0.040165
ESYT1	extended synaptotagmin-like protein 1	5.81	0.040499
CPNE3	copine III	-5.8	0.040553
FAM196A	family with sequence similarity 196, member A	-5.8	0.040571
LY86-AS1	LY86 antisense RNA 1 (non-protein coding)	5.78	0.040665
ACAN	aggrecan	5.75	0.041106
SLA	Src-like-adaptor	-5.73	0.041307
SLCO4A1	solute carrier organic anion transporter family, member 4A1	5.72	0.041537
PDIA5	protein disulfide isomerase family A, member 5	5.67	0.042419
INTU	inturned planar cell polarity effector homolog (Drosophila)	-5.65	0.042711
ANKRD6	ankyrin repeat domain 6	-5.65	0.042738
AQP9	aquaporin 9	5.64	0.042809
LOXL1	lysyl oxidase-like 1	-5.63	0.042809
CMPK1	cytidine monophosphate (UMP-CMP) kinase 1, cytosolic	-5.62	0.042853
DIRAS3	DIRAS family, GTP-binding RAS-like 3	-5.61	0.042853
SESN3	sestrin 3	-5.61	0.042853
SYTL2	synaptotagmin-like 2	5.62	0.042853
FAM43A	family with sequence similarity 43, member A	5.58	0.043085
OPHN1	oligophrenin 1	-5.57	0.043113
SLC22A9	solute carrier family 22 (organic anion transporter), member 9	5.57	0.043113
SULF2	sulfatase 2	-5.57	0.043113
DPP8	dipeptidyl-peptidase 8	5.5	0.043942
KIAA1107	KIAA1107	5.51	0.043942
SLC25A12	solute carrier family 25 (aspartate/glutamate carrier), member 12	5.49	0.044062
DTWD1	DTW domain containing 1	-5.48	0.044292
NKAIN3	Na+/K+ transporting ATPase interacting 3	-5.48	0.044292
KNG1	kininogen 1	5.46	0.044358
NAT8L	N-acetyltransferase 8-like (GCN5-related, putative)	5.46	0.044358
TSHZ1	teashirt zinc finger homeobox 1	5.46	0.044358
CHID1	chitinase domain containing 1	-5.43	0.044814
FMN1	formin 1	5.42	0.044814
GPR137C	G protein-coupled receptor 137C	5.42	0.044814
HES4	hairy and enhancer of split 4 (Drosophila)	-5.43	0.044814
CRTAC1	cartilage acidic protein 1	5.41	0.044893
NUPR1	nuclear protein, transcriptional regulator, 1	-5.4	0.044902
CD63	CD63 molecule	-5.39	0.044989
KCNA5	potassium voltage-gated channel, shaker-related subfamily, member 5	5.39	0.045074
STARD5	StAR-related lipid transfer (START) domain containing 5	5.39	0.045074
FNDC5	fibronectin type III domain containing 5	5.37	0.045203
ANK1	ankyrin 1, erythrocytic	5.36	0.045461
C17orf75	chromosome 17 open reading frame 75	5.34	0.045859
CDC42EP3	CDC42 effector protein (Rho GTPase binding) 3	5.32	0.045907
RILP	Rab interacting lysosomal protein	5.32	0.045907
ENKUR	enkurin, TRPC channel interacting protein	-5.3	0.046123
FBLN2	fibulin 2	-5.3	0.046123
ABTB1	ankyrin repeat and BTB (POZ) domain containing 1	5.29	0.046226
PYGL	phosphorylase, glycogen, liver	-5.29	0.046226
FAM117A	family with sequence similarity 117, member A	-5.28	0.046379
IL33	interleukin 33	-5.26	0.046609
SLC17A6	solute carrier family 17 (sodium-dependent inorganic phosphate cotransporter), member 6	5.26	0.046646
ENO2	enolase 2 (gamma, neuronal)	5.25	0.046709
MET	met proto-oncogene (hepatocyte growth factor receptor)	5.23	0.04683
PRKCD	protein kinase C, delta	-5.23	0.04683
BAIAP2L2	BAI1-associated protein 2-like 2	5.22	0.047171
CHAF1A	chromatin assembly factor 1, subunit A (p150)	5.22	0.047171
SLC24A2	solute carrier family 24 (sodium/potassium/calcium exchanger), member 2	5.2	0.047695
RXFP1	relaxin/insulin-like family peptide receptor 1	5.19	0.047866
WDR1	WD repeat domain 1	-5.15	0.048441
CHRNA3	cholinergic receptor, nicotinic, alpha 3 (neuronal)	-5.14	0.048596
GSTM2	glutathione S-transferase mu 2 (muscle)	-5.14	0.048728
CACNB4	calcium channel, voltage-dependent, beta 4 subunit	5.11	0.049218
MOGAT1	monoacylglycerol O-acyltransferase 1	5.11	0.049242
MAT2B	methionine adenosyltransferase II, beta	5.1	0.049291
KCNH7	potassium voltage-gated channel, subfamily H (eag-related), member 7	5.08	0.049617
SETBP1	SET binding protein 1	5.08	0.049657
FREM3	FRAS1 related extracellular matrix 3	5.07	0.049773
VAV1	vav 1 guanine nucleotide exchange factor	-5.07	0.049941
